# Supplementary material for: A comprehensive evaluation of 181 reported CHST6 variants in patients with macular corneal dystrophy
Source: publisher site journal article supplement (doi:10.18632/aging.101807), 2019-02-04
Supplement: Supplementary file 8 [file aging-v11i3-101807-supplementary-material-SD4.xlsx]

## Sheet: 工作表1
Table S4. The normalized conservation score of each residue in the CHST6 protein calculated by the Consurf Server
- POS: The position of the AA in the SEQRES derived sequence.
- SEQ: The SEQRES derived sequence in one letter code.
- SCORE: The normalized conservation scores.
- COLOR: The color scale representing the conservation scores (9 - conserved, 1 - variable).
- CONFIDENCE INTERVAL: When using the bayesian method for calculating rates, a confidence interval is assigned to each of the inferred evolutionary conservation scores.
- CONFIDENCE INTERVAL COLORS: When using the bayesian method for calculating rates. The color scale representing the lower and upper bounds of the confidence interval.
- B/E: Burried (b) or Exposed (e) residue.
- FUNCTION: functional (f) or structural (s) residue (f - highly conserved and exposed, s - highly conserved and burried).
- MSA DATA: The number of aligned sequences having an amino acid (non-gapped) from the overall number of sequences at each position.
- RESIDUE VARIETY: The residues variety at each position of the multiple sequence alignment.
POS	SEQ	SCORE	COLOR	Confidence Interval		CI_color		B/E	Function	MSA data	Residue variety
1	M	-0.985	9	-1.208	-0.898	9	8	e	f	14/150	M
2	W	0.933	2	-0.069	1.657	5	1	e		14/150	R,W
3	L	-0.116	5	-0.754	0.354	8	4	e		14/150	L,K
4	P	1.006	1	0.053	1.657	5	1	e		14/150	P,S,I,R
5	R	-0.745	8	-1.019	-0.579	9	7	e	f	30/150	M,S,R
6	V	1.188	1	0.354	1.657	4	1	b		33/150	L,F,I,A,V
7	S	-0.211	6	-0.579	0.053	7	5	e		33/150	P,N,S,A,K
8	S	-0.18	6	-0.511	0.053	7	5	e		34/150	N,L,S,A,T,K
9	T	0.615	3	0.053	0.8	5	2	e		39/150	L,A,T,Q,S,P,R,G,K
10	A	1.378	1	0.551	1.657	3	1	b		45/150	T,C,A,D,F,V,P,S,I,R
11	V	0.286	4	-0.176	0.551	6	3	b		48/150	I,S,L,M,T,A,V
12	T	1.282	1	0.551	1.657	3	1	b		48/150	V,P,I,R,T,A,L,F
13	A	1.704	1	0.8	1.657	2	1	b		50/150	L,F,A,T,S,I,V,G
14	L	0.732	2	0.191	1.136	4	1	b		51/150	M,V,I,F,L
15	L	0.821	2	0.191	1.136	4	1	b		54/150	M,A,V,F,I,L
16	L	1.565	1	0.8	1.657	2	1	b		55/150	F,I,L,M,V,A,T
17	A	0.503	3	0.053	0.8	5	2	b		55/150	L,S,I,T,C,A,V
18	Q	-0.731	8	-0.941	-0.579	8	7	e	f	57/150	L,Q,P,V
19	T	0.633	3	0.191	0.8	4	2	b		58/150	L,F,T,A,H,S,I,V,G
20	F	1.269	1	0.551	1.657	3	1	b		61/150	L,F,A,C,T,I,V,G
21	L	0.907	2	0.354	1.136	4	1	b		65/150	L,F,I,A,V,T
22	L	0.241	4	-0.176	0.551	6	3	b		67/150	M,V,A,I,F,L
23	L	0.648	3	0.191	0.8	4	2	b		69/150	I,F,H,L,G,C,V
24	F	0.892	2	0.354	1.136	4	1	b		70/150	M,V,F,I,L,H
25	L	1.601	1	0.8	1.657	2	1	b		73/150	V,M,H,Y,S,I,C,L,F
26	V	3.023	1	1.657	3.044	1	1	b		73/150	F,L,C,A,I,R,H,Q,S,Y,M,V
27	S	0.985	1	0.551	1.136	3	1	b		73/150	L,D,F,A,C,T,Q,Y,N,S,P,R,K,M,G
28	R	0.935	2	0.354	1.136	4	1	b		72/150	I,R,P,Y,S,Q,M,K,W,V,F,L
29	P	1.63	1	0.8	1.657	2	1	e		73/150	W,P,H,N,S,Q,Y,R,T,D,F
30	G	2.424	1	1.136	3.044	1	1	e		74/150	L,A,E,C,T,Y,Q,S,N,H,R,I,V,K,G
31	P	1.449	1	0.8	1.657	2	1	e		69/150	A,E,T,L,V,G,K,Y,N,Q,S,H,P,R
32	S	2.818	1	1.657	3.044	1	1	e		93/150	L,T,C,E,A,P,H,Y,Q,S,R,V,K,G
33	S	2.991	1	1.657	3.044	1	1	e		100/150	L,D,A,C,R,N,S,Y,Q,P,H,G,K,E,T,I
34	P	1.472	1	0.8	1.657	2	1	e		103/150	S,Q,P,R,V,G,K,L,D,F,E,A,C,T
35	A	2.604	1	1.136	3.044	1	1	e		104/150	E,A,T,K,V,W,R,I,N,Q,S,P
36	G	2.239	1	1.136	3.044	1	1	e		106/150	L,D,E,C,A,T,N,Y,S,Q,P,R,G,K
37	G	1.358	1	0.8	1.657	2	1	e		103/150	E,A,T,D,G,K,R,N,Q,S,P
38	E	2.803	1	1.657	3.044	1	1	e		125/150	V,G,K,P,H,Y,Q,S,N,R,T,A,E,D,L
39	A	2.914	1	1.657	3.044	1	1	e		134/150	V,G,K,P,N,S,Q,R,T,E,A,D
40	R	-0.027	5	-0.272	0.191	6	4	e		145/150	A,H,P,Q,Y,S,R,K,M
41	V	-0.146	6	-0.359	-0.069	6	5	b		145/150
42	H	-1.071	9	-1.153	-1.019	9	9	b	s	145/150	H,L,N,Q,E
43	V	-0.502	7	-0.699	-0.359	8	6	b		145/150
44	L	-0.936	8	-1.055	-0.853	9	8	b		146/150
45	V	-0.543	7	-0.699	-0.438	8	7	b		146/150
46	L	-0.744	8	-0.898	-0.641	8	7	b		146/150
47	S	-1.128	9	-1.208	-1.09	9	9	b	s	147/150	T,A,S
48	S	-1.08	9	-1.153	-1.055	9	9	b	s	147/150	D,S,T
49	W	-0.973	9	-1.122	-0.898	9	8	b	s	147/150	A,T,W,I
50	R	-1.232	9	-1.263	-1.233	9	9	e	f	147/150	R
51	S	-1.164	9	-1.233	-1.122	9	9	e	f	147/150	C,T,S
52	G	-1.215	9	-1.263	-1.208	9	9	b	s	147/150	G
53	S	-1.24	9	-1.263	-1.233	9	9	b	s	147/150	S
54	S	-1.139	9	-1.208	-1.122	9	9	e	f	147/150	T,A,S
55	F	-0.881	8	-1.019	-0.804	9	8	b		147/150
56	V	-0.087	5	-0.359	0.053	6	5	b		147/150	M,V,I,S,A,T,F,L
57	G	-1.215	9	-1.263	-1.208	9	9	b	s	147/150	G
58	Q	-1.127	9	-1.208	-1.09	9	9	e	f	147/150	H,Q,E
59	L	-0.562	7	-0.754	-0.438	8	7	b		147/150
60	F	-1.161	9	-1.233	-1.122	9	9	b	s	148/150	L,F
61	N	-0.955	8	-1.055	-0.898	9	8	e	f	148/150	G,N,S
62	Q	-1.2	9	-1.254	-1.181	9	9	e	f	148/150	H,Q
63	H	-1.077	9	-1.153	-1.019	9	9	e	f	148/150	H,N,Q
64	P	-0.853	8	-0.981	-0.754	9	8	e	f	148/150	F,P,L,S,G,T,A
65	D	-0.315	6	-0.511	-0.176	7	6	e		148/150
66	V	-1.085	9	-1.181	-1.055	9	9	b	s	148/150	T,V,A,I,F
67	F	-1.214	9	-1.263	-1.208	9	9	b	s	148/150	F
68	Y	-1.096	9	-1.208	-1.055	9	9	b	s	148/150	F,Y
69	L	-1.111	9	-1.208	-1.055	9	9	b	s	148/150	M,L
70	M	-1.04	9	-1.153	-0.981	9	9	b	s	148/150	M,F,Y,S,N
71	E	-1.229	9	-1.263	-1.208	9	9	b	s	148/150	E
72	P	-1.22	9	-1.263	-1.208	9	9	b	s	148/150	P
73	A	-0.598	7	-0.754	-0.511	8	7	b		148/150
74	W	-0.684	7	-0.898	-0.511	8	7	b		148/150
75	H	-1.104	9	-1.181	-1.055	9	9	e	f	148/150	L,N,S,H
76	V	-0.99	9	-1.09	-0.941	9	8	b	s	148/150	L,I,V,M
77	W	-0.937	8	-1.09	-0.853	9	8	b		148/150
78	T	0.555	3	0.191	0.8	4	2	b		148/150	K,G,M,V,R,I,Y,Q,S,N,A,E,T,L,D
79	T	0.847	2	0.354	1.136	4	1	e		148/150	A,T,N,Q,S,R,V,W,G,K
80	L	-0.124	5	-0.359	0.053	6	5	b		148/150	V,M,K,N,I,A,L,F
81	S	1.368	1	0.8	1.657	2	1	e		148/150	W,I,E,T,V,K,N,S,Q,Y,H,P,R,A,L,D,F																F
82	Q	0.279	4	-0.069	0.551	5	3	e		148/150	W,K,G,M,S,N,Y,Q,H,P,R,E,T,D,F
83	G	-0.095	5	-0.359	0.053	6	5	e		149/150	V,G,Q,S,N,P,H,I,E,A,T,L,D
84	S	-0.275	6	-0.511	-0.176	7	6	e		149/150
85	A	-0.743	8	-0.898	-0.641	8	7	b		149/150
86	A	1.476	1	0.8	1.657	2	1	e		149/150	G,K,W,V,I,R,H,P,S,Q,A,E,D,L
87	T	0.829	2	0.354	1.136	4	1	b		149/150	V,M,K,G,H,N,Q,S,I,R,T,A,L,F
88	L	-0.927	8	-1.055	-0.853	9	8	b		149/150
89	H	-0.465	7	-0.641	-0.359	7	6	e		149/150
90	M	-0.917	8	-1.055	-0.853	9	8	b		149/150
91	A	-0.897	8	-1.019	-0.853	9	8	b		149/150
92	V	-0.519	7	-0.699	-0.438	8	7	b		149/150
93	R	-1.232	9	-1.263	-1.233	9	9	e	f	149/150	R
94	D	-1.2	9	-1.254	-1.181	9	9	e	f	149/150	S,D
95	L	-0.838	8	-0.981	-0.754	9	8	b		149/150
96	V	-0.044	5	-0.272	0.053	6	5	b		149/150	V,M,L,F,I
97	R	-0.304	6	-0.511	-0.176	7	6	e		149/150
98	S	-0.697	8	-0.853	-0.641	8	7	b		149/150
99	V	-0.424	7	-0.641	-0.272	7	6	b		149/150
100	F	-0.455	7	-0.641	-0.359	7	6	b		149/150
101	L	0.165	4	-0.176	0.354	6	4	e		149/150	D,L,T,A,R,H,Q,G,K
102	C	-1.15	9	-1.233	-1.122	9	9	b	s	149/150	R,C
103	D	-1.096	9	-1.181	-1.055	9	9	e	f	149/150	E,D,H,N
104	M	-0.445	7	-0.641	-0.359	7	6	b		149/150
105	D	-0.689	8	-0.853	-0.579	8	7	e	f	149/150	E,A,T,D,F,G,N,S,Y,H
106	V	-0.766	8	-0.898	-0.699	8	8	b		149/150
107	F	-0.78	8	-0.941	-0.699	8	8	b		149/150
108	D	-0.406	6	-0.579	-0.272	7	6	e		149/150
109	A	-0.358	6	-0.579	-0.272	7	6	b		149/150
110	Y	-1.099	9	-1.208	-1.055	9	9	b	s	149/150	Y,H,F
111	L	0.017	5	-0.272	0.191	6	4	b		149/150	M,V,I,N,Q,S,H,A,T,L
112	P	-0.24	6	-0.511	-0.069	7	5	e		141/150
113	W	1.562	1	0.8	1.657	2	1	e		148/150	T,E,I,M,W,F,D,L,A,R,H,P,N,Q,S,G,K,V																K	V
114	R	0.775	2	0.354	1.136	4	1	e		146/150	D,L,T,E,A,P,H,Q,N,S,R,K,G
115	R	0.243	4	-0.069	0.354	5	4	e		147/150	V,K,M,S,Q,Y,P,H,R,I,C,A,L,F
116	N	0.525	3	0.191	0.8	4	2	e		149/150	Q,Y,S,N,R,I,V,M,K,L,D,F,E,A,T
117	L	0.065	5	-0.176	0.191	6	4	e		149/150	M,G,K,V,I,Q,S,T,A,D,L
118	S	-0.844	8	-0.981	-0.754	9	8	e	f	149/150	F,D,L,T,A,R,P,H,Q,N,S,K,M
119	D	0.584	3	0.191	0.8	4	2	e		149/150	E,T,I,M,F,D,A,R,N,S,Y,Q,H,K,G,V
120	L	-0.249	6	-0.511	-0.069	7	5	b		149/150
121	F	-1.156	9	-1.233	-1.122	9	9	b	s	149/150	F,G
122	Q	-0.502	7	-0.699	-0.359	8	6	e		149/150
123	W	-0.53	7	-0.754	-0.359	8	6	b		149/150
124	A	0.111	5	-0.176	0.191	6	4	e		149/150	K,G,M,P,H,S,Y,Q,R,T,E,A,D,F
125	V	0.339	4	0.053	0.551	5	3	b		149/150	F,D,L,A,R,H,N,Q,S,Y,G,K,V,T,E,M,W																W
126	S	-1.218	9	-1.254	-1.208	9	9	b	s	149/150	N,S
127	R	-0.859	8	-0.981	-0.804	9	8	e	f	149/150	K,R,S,N,Q,H,P,T
128	A	-1.052	9	-1.153	-1.019	9	9	e	f	149/150	L,N,S,G,A,V
129	L	-0.925	8	-1.055	-0.853	9	8	b		149/150
130	C	-1.209	9	-1.263	-1.181	9	9	b	s	149/150	C
131	S	-0.999	9	-1.09	-0.941	9	8	e	f	149/150	T,A,E,S,Q
132	P	0.084	5	-0.176	0.191	6	4	e		149/150	T,A,E,D,L,V,H,P,S,Y,Q
133	P	-1.221	9	-1.263	-1.208	9	9	e	f	150/150	P
134	A	-0.792	8	-0.941	-0.699	8	8	b		150/150
135	C	-1.209	9	-1.263	-1.181	9	9	b	s	150/150	C
136	S	1.288	1	0.8	1.657	2	1	e		150/150	S,Q,Y,N,P,H,M,K,G,F,L,D,E,A,T
137	A	1.098	1	0.551	1.136	3	1	e		150/150	H,P,Q,Y,S,I,V,G,M,L,F,T,E,A
138	F	0.107	5	-0.176	0.354	6	4	e		150/150	F,L,E,T,I,S,N,Q,Y,P,H,M,K
139	P	1.343	1	0.8	1.657	2	1	e		150/150	K,G,V,W,R,I,N,Q,S,P,E,A,T,L,D
140	R	-0.259	6	-0.511	-0.176	7	6	e		146/150
141	G	1.66	1	1.136	1.657	1	1	e		142/150	E,A,T,L,D,K,G,R,I,N,S,P,H
142	A	1.099	1	0.551	1.136	3	1	e		142/150	P,H,S,Q,N,I,R,V,M,K,D,L,T,E,A
143	I	-0.195	6	-0.438	-0.069	7	5	b		131/150
144	S	-0.115	5	-0.359	0.053	6	5	e		147/150	M,V,I,N,Y,S,H,A,T,F,L
145	S	0.555	3	0.191	0.8	4	2	e		150/150	R,H,P,Q,S,Y,N,K,G,F,D,L,A,I,T,E
146	E	0.477	3	0.191	0.551	4	3	e		150/150	D,A,E,T,R,Q,S,Y,P,H,G,K,V
147	A	1.635	1	1.136	1.657	1	1	e		150/150	W,M,I,T,E,V,K,G,P,H,N,Y,S,Q,R,A,D,L																D	L
148	V	0.914	2	0.551	1.136	3	1	e		150/150	D,L,F,A,P,H,Q,N,S,R,V,G,K,T,E,I,M																M
149	C	-1.209	9	-1.263	-1.181	9	9	b	s	150/150	C
150	K	1.041	1	0.551	1.136	3	1	e		150/150	R,S,N,Q,Y,G,K,W,V,F,D,L,A,E
151	P	1.198	1	0.8	1.657	2	1	e		150/150	K,V,R,I,Q,Y,N,S,P,H,A,E,T,L
152	L	1.032	1	0.551	1.136	3	1	e		135/150	K,M,V,I,R,H,N,Q,S,T,E,A,L
153	C	-1.209	9	-1.263	-1.181	9	9	b	s	150/150	C
154	A	1.359	1	0.8	1.657	2	1	e		150/150	S,Q,Y,N,H,P,R,G,K,D,A,E,T
155	R	1.319	1	0.8	1.657	2	1	e		150/150	T,A,L,F,V,M,G,K,H,P,N,S,Q,R
156	Q	1.337	1	0.8	1.657	2	1	e		150/150	A,F,L,K,V,R,H,P,S,Q,Y,N,T,E,M,I
157	S	-0.15	6	-0.359	0.053	6	5	e		150/150	R,Q,N,S,P,G,K,L,D,A,T
158	F	-0.081	5	-0.359	0.053	6	5	b		150/150	I,F,P,L,M,T,V
159	T	0.961	2	0.551	1.136	3	1	e		150/150	D,L,F,T,A,E,H,N,Q,S,R,G,K
160	L	1.547	1	0.8	1.657	2	1	e		150/150	R,I,Y,Q,S,G,M,K,V,L,D,E,A,T
161	A	-0.329	6	-0.511	-0.176	7	6	b		150/150
162	R	-0.024	5	-0.272	0.191	6	4	e		150/150	A,E,T,Q,S,R,I,V,K,G
163	E	0.49	3	0.191	0.8	4	2	e		150/150	D,T,E,A,R,S,Q,K
164	A	-0.615	7	-0.754	-0.511	8	7	b		150/150
165	C	-1.209	9	-1.263	-1.181	9	9	b	s	150/150	C
166	R	1.117	1	0.551	1.136	3	1	e		150/150	G,K,R,S,Q,N,H,E,A,T,L,D
167	S	0.342	4	0.053	0.551	5	3	e		150/150	T,A,E,F,D,L,G,K,I,R,Q,N,S
168	Y	-0.462	7	-0.699	-0.359	8	6	e		150/150
169	S	-0.504	7	-0.699	-0.438	8	7	b		150/150
170	H	-1.071	9	-1.153	-1.019	9	9	e	f	150/150	H,S,T,A,V
171	V	-0.383	6	-0.579	-0.272	7	6	b		150/150
172	V	-0.883	8	-0.981	-0.804	9	8	b		150/150
173	L	-0.076	5	-0.359	0.053	6	5	b		150/150	V,M,Y,L,I,F
174	K	-1.228	9	-1.263	-1.208	9	9	e	f	150/150	K
175	E	-0.773	8	-0.898	-0.699	8	8	e	f	150/150	I,D,S,G,T,E,A
176	V	-1.059	9	-1.153	-1.019	9	9	b	s	150/150	T,V,I,F
177	R	-1.232	9	-1.263	-1.233	9	9	e	f	150/150	R
178	F	-0.113	5	-0.359	0.053	6	5	b		150/150	L,F,I,V,M
179	F	-0.597	7	-0.804	-0.511	8	7	b		150/150
180	N	-0.525	7	-0.699	-0.438	8	7	e		150/150
181	L	-0.496	7	-0.699	-0.359	8	6	b		150/150
182	Q	0.42	3	0.053	0.551	5	3	e		150/150	V,K,G,H,N,S,Q,R,T,A,E,D
183	V	-0.314	6	-0.511	-0.176	7	6	b		150/150
184	L	-1.113	9	-1.208	-1.055	9	9	b	s	150/150	V,I,L
185	Y	-0.113	5	-0.359	0.053	6	5	e		150/150	F,L,A,I,R,H,S,Y,Q,K,V
186	P	-0.843	8	-0.981	-0.754	9	8	e	f	150/150	L,S,Q,P,A,T
187	L	-1.217	9	-1.263	-1.208	9	9	b	s	150/150	L
188	L	-0.278	6	-0.511	-0.176	7	6	b		150/150
189	S	0.604	3	0.191	0.8	4	2	e		150/150	D,L,T,A,E,H,S,Q,N,I,R,K,M
190	D	-1.233	9	-1.263	-1.233	9	9	e	f	150/150	D
191	P	-0.923	8	-1.055	-0.853	9	8	e	f	150/150	A,P,L,Y,S
192	A	-0.137	5	-0.359	-0.069	6	5	e		150/150
193	L	-0.793	8	-0.941	-0.699	8	8	e	f	150/150	L,I,V
194	N	-0.465	7	-0.641	-0.359	7	6	e		150/150
195	L	-0.846	8	-0.981	-0.754	9	8	b		150/150
196	R	-0.381	6	-0.579	-0.272	7	6	e		150/150
197	I	-0.725	8	-0.853	-0.641	8	7	b		150/150
198	V	-0.444	7	-0.641	-0.359	7	6	b		150/150
199	H	-1.108	9	-1.181	-1.055	9	9	e	f	150/150	H,Q
200	L	-1.217	9	-1.263	-1.208	9	9	b	s	150/150	L
201	V	-0.997	9	-1.09	-0.941	9	8	b	s	150/150	V,I,F
202	R	-1.232	9	-1.263	-1.233	9	9	e	f	150/150	R
203	D	-1.233	9	-1.263	-1.233	9	9	b	s	150/150	D
204	P	-1.221	9	-1.263	-1.208	9	9	b	s	150/150	P
205	R	-1.232	9	-1.263	-1.233	9	9	e	f	150/150	R
206	A	-1.088	9	-1.181	-1.055	9	9	e	f	150/150	G,A
207	V	-0.996	9	-1.09	-0.941	9	8	b	s	150/150	I,V,M
208	L	0.395	4	0.053	0.551	5	3	b		150/150	V,M,G,H,Y,I,E,A,L,F
209	R	-0.159	6	-0.359	-0.069	6	5	e		150/150
210	S	-1.24	9	-1.263	-1.233	9	9	e	f	150/150	S
211	R	-1.093	9	-1.181	-1.055	9	9	e	f	150/150	K,R
212	E	-0.169	6	-0.438	-0.069	7	5	e		150/150
213	Q	0.657	3	0.354	0.8	4	2	e		150/150	S,N,Y,Q,H,R,V,K,G,L,A,E,T
214	T	-0.437	7	-0.641	-0.359	7	6	b		150/150
215	A	0.774	2	0.354	1.136	4	1	e		146/150	L,F,A,E,T,N,S,Y,P,R,I,V,G,K,M
216	K	2.084	1	1.136	3.044	1	1	e		146/150	I,M,W,E,T,R,Y,S,Q,N,H,P,K,G,V,F,L,D,A																L	D	A
217	A	0.465	3	0.053	0.551	5	3	e		150/150	F,D,L,A,E,I,P,S,N,Y,G,W
218	L	-0.469	7	-0.699	-0.359	8	6	b		150/150
219	A	1.076	1	0.551	1.136	3	1	e		150/150	A,D,L,F,V,K,G,H,Q,Y,S,N,R,T,E,W,M,I																M	I
220	R	0.39	4	0.053	0.551	5	3	e		150/150	E,T,I,M,F,L,A,R,Q,S,Y,N,P,H,K,G,V																V
221	D	-0.732	8	-0.898	-0.641	8	7	e	f	150/150	S,N,G,D,L,T,A,E
222	N	-0.351	6	-0.579	-0.272	7	6	b		150/150
223	G	0.634	3	0.191	0.8	4	2	e		150/150	T,E,M,I,A,D,L,F,K,G,P,H,S,N,Q,R
224	I	-0.66	7	-0.804	-0.579	8	7	e		150/150
225	V	-0.707	8	-0.853	-0.641	8	7	b		150/150
226	L	0.026	5	-0.272	0.191	6	4	b		150/150	R,I,N,Q,S,G,M,V,L,D,E,A
227	G	0.194	4	-0.069	0.354	5	4	e		150/150	D,E,A,H,S,Q,N,R,V,G,K
228	T	0.41	4	0.053	0.551	5	3	e		150/150	R,N,S,Q,P,H,G,K,M,V,F,D,E,A,T
229	N	1.256	1	0.8	1.657	2	1	e		150/150	K,G,H,P,N,S,Q,I,R,T,A,E,D,L
230	G	1.34	1	0.8	1.657	2	1	e		149/150	D,L,A,E,R,P,S,Q,N,K,G,W,V
231	T	1.335	1	0.8	1.657	2	1	e		147/150	V,K,M,H,P,S,N,Q,I,R,T,A,E,D,L
232	W	2.684	1	1.136	3.044	1	1	e		131/150	K,G,M,W,R,N,Q,S,P,E,A,T,L,D
233	V	1.593	1	0.8	1.657	2	1	e		55/150	L,D,E,A,I,S,Y,H,M,G,V
234	E	0.848	2	0.354	1.136	4	1	e		146/150	T,E,A,D,L,V,G,K,P,Q,N,S,I,R
235	A	0.736	2	0.354	0.8	4	2	e		148/150	T,E,W,I,A,D,L,G,K,P,H,Q,S,N,Y,R
236	D	-0.123	5	-0.359	0.053	6	5	e		149/150	L,D,E,A,T,I,N,Y,Q,S,P,M,K
237	P	0.986	1	0.551	1.136	3	1	e		149/150	T,E,I,W,M,D,L,A,P,H,Q,Y,S,N,R,V,K,G																K	G
238	G	0.284	4	-0.069	0.551	5	3	e		149/150	I,T,E,V,K,G,P,H,N,S,Q,R,A,D,L,F
239	L	0.409	4	0.053	0.551	5	3	b		149/150	F,L,A,T,I,N,S,Q,Y,P,V
240	R	1.23	1	0.8	1.657	2	1	e		149/150	A,E,T,L,D,G,K,V,W,R,S,Y,N,Q,H
241	V	-0.035	5	-0.272	0.053	6	5	b		149/150	V,K,M,S,Q,R,I,A,T,L
242	V	-0.326	6	-0.511	-0.176	7	6	b		149/150
243	R	0.077	5	-0.176	0.191	6	4	e		149/150	R,S,N,Q,G,M,K,T,E,A
244	E	0.134	5	-0.176	0.354	6	4	e		150/150	V,G,M,K,N,Q,I,R,T,E,A,L
245	V	-0.618	7	-0.754	-0.511	8	7	b		150/150
246	C	-1.209	9	-1.263	-1.181	9	9	b	s	150/150	C
247	R	0.531	3	0.191	0.8	4	2	e		150/150	D,E,R,S,N,Q,H,K,V
248	S	-0.911	8	-1.019	-0.853	9	8	e	f	150/150	R,S,N,H,G,D,A,T
249	H	-0.393	6	-0.579	-0.272	7	6	e		150/150
250	V	0.509	3	0.191	0.8	4	2	b		150/150	K,M,V,W,R,I,S,Q,H,E,A,T,F,L,D
251	R	0.576	3	0.191	0.8	4	2	e		150/150	V,K,G,M,S,N,Q,R,A,E,C,L,D
252	I	-0.977	9	-1.09	-0.941	9	8	b	s	150/150	M,V,T,I,S,D
253	A	0.412	4	0.053	0.551	5	3	b		150/150	A,L,F,V,G,M,K,H,S,Y,N,I,R
254	E	0.373	4	0.053	0.551	5	3	e		150/150	Q,S,N,I,R,K,M,G,D,L,T,E,A
255	A	-0.508	7	-0.699	-0.438	8	7	e		150/150
256	A	-0.409	6	-0.579	-0.272	7	6	b		149/150
257	T	1.189	1	0.551	1.657	3	1	e		81/150	I,R,N,S,M,K,V,F,L,T,A
258	L	1.609	1	1.136	1.657	1	1	e		149/150	Q,S,Y,H,P,R,V,K,L,D,F,A,I,M,E,T
259	K	0.638	3	0.191	0.8	4	2	e		149/150	E,A,T,F,L,D,G,K,R,N,Y,Q,S,P,H
260	P	0.197	4	-0.069	0.354	5	4	e		146/150	V,W,G,K,M,S,Q,N,P,R,I,A,L,F
261	P	-0.825	8	-0.981	-0.754	9	8	e	f	146/150	G,T,A,F,P,S,L
262	P	0.914	2	0.551	1.136	3	1	e		146/150	Q,S,N,H,P,R,K,G,L,D,A,E,T
263	F	-0.231	6	-0.511	-0.069	7	5	e		146/150
264	L	-0.898	8	-1.019	-0.804	9	8	b		149/150
265	R	0.382	4	0.053	0.551	5	3	e		149/150	R,D,S,Q,G,K,E
266	G	0.038	5	-0.272	0.191	6	4	e		148/150	E,D,K,G,R,S,N,Q
267	R	-0.899	8	-1.019	-0.853	9	8	e	f	148/150	A,K,N,S,H,R
268	Y	-1.098	9	-1.208	-1.055	9	9	b	s	148/150	Y,F
269	R	-0.351	6	-0.579	-0.272	7	6	e		148/150
270	L	0.121	5	-0.176	0.354	6	4	b		148/150	L,T,A,I,R,Q,K,M,V
271	V	-0.404	6	-0.579	-0.272	7	6	b		148/150
272	R	-1.163	9	-1.233	-1.122	9	9	e	f	148/150	R,H,G
273	F	-0.7	8	-0.898	-0.579	8	7	b		148/150
274	E	-1.194	9	-1.254	-1.181	9	9	e	f	148/150	E,G
275	D	-1.232	9	-1.263	-1.233	9	9	e	f	147/150	D
276	L	-0.296	6	-0.511	-0.176	7	6	b		147/150
277	A	-0.654	7	-0.804	-0.579	8	7	b		148/150
278	R	0.034	5	-0.272	0.191	6	4	e		148/150	L,F,A,E,S,N,Q,H,P,R,V,K,G
279	E	0.609	3	0.191	0.8	4	2	e		148/150	H,Q,S,N,R,W,M,K,D,F,T,E,A
280	P	-1.175	9	-1.254	-1.153	9	9	e	f	148/150	T,P
281	L	0.263	4	-0.069	0.354	5	4	b		148/150	Q,L,F,I,V,E,M
282	A	1.014	1	0.551	1.136	3	1	e		148/150	T,E,A,D,L,K,G,V,R,P,S,Q
283	E	-0.077	5	-0.359	0.053	6	5	e		148/150	K,V,W,R,I,Y,Q,N,H,E,A,T,L
284	I	-0.264	6	-0.438	-0.176	7	6	b		148/150
285	R	0.808	2	0.354	1.136	4	1	e		148/150	T,A,E,G,K,H,Q,N,S,R
286	A	0.757	2	0.354	0.8	4	2	e		148/150	D,T,E,A,N,S,Q,R,G,K
287	L	-0.159	6	-0.359	-0.069	6	5	b		148/150
288	Y	-0.983	9	-1.122	-0.898	9	8	b	s	148/150	L,Y,H,F
289	A	1.701	1	1.136	1.657	1	1	e		148/150	A,E,T,L,D,G,K,N,S,Q,H,R
290	F	-0.938	8	-1.055	-0.853	9	8	b		148/150
291	T	-0.145	6	-0.359	-0.069	6	5	b		148/150
292	G	-0.525	7	-0.699	-0.438	8	7	e		148/150
293	L	-1.018	9	-1.122	-0.941	9	8	b	s	148/150	M,I,L
294	S	1.767	1	1.136	1.657	1	1	e		148/150	G,K,V,R,P,H,Q,N,S,T,E,A,D,L
295	L	-0.062	5	-0.359	0.053	6	5	b		148/150	I,R,P,S,M,W,V,F,L,T,A
296	T	-0.473	7	-0.641	-0.359	7	6	e		148/150
297	P	1.281	1	0.8	1.657	2	1	e		148/150	E,A,T,D,G,M,K,Q,S,N,P,H,R,I
298	Q	1.343	1	0.8	1.657	2	1	e		148/150	P,H,S,Y,N,Q,R,W,M,G,K,D,T,A,E
299	L	-0.583	7	-0.754	-0.438	8	7	b		148/150
300	E	0.29	4	-0.069	0.551	5	3	e		148/150	R,S,Q,K,G,V,D,T,A,E
301	A	1.349	1	0.8	1.657	2	1	e		148/150	W,V,K,M,G,Q,N,S,I,R,T,A,E,D
302	W	-0.984	9	-1.122	-0.898	9	8	b	s	148/150	Y,F,W
303	I	-0.843	8	-0.981	-0.754	9	8	b		148/150
304	H	0.834	2	0.354	1.136	4	1	e		148/150	L,F,E,N,Q,Y,H,R,I,V,K,M
305	N	-0.318	6	-0.511	-0.176	7	6	e		148/150
306	I	-0.657	7	-0.804	-0.579	8	7	b		148/150
307	T	-1.239	9	-1.263	-1.233	9	9	e	f	148/150	T
308	H	-0.592	7	-0.754	-0.511	8	7	e		148/150
309	G	-0.717	8	-0.898	-0.641	8	7	e	f	148/150	G,K,A,W,S,P
310	S	0.871	2	0.354	1.136	4	1	e		147/150	D,L,T,E,A,H,P,Y,N,S,Q,R,V,K
311	G	0.172	4	-0.176	0.354	6	4	e		147/150	R,Q,N,S,H,G,V,L,D,A,T
312	P	1.283	1	0.8	1.657	2	1	e		144/150	V,G,K,P,Y,Q,S,N,R,A,D,L,M,I,T,E
313	G	0.057	5	-0.272	0.191	6	4	e		147/150	V,G,K,P,N,Q,S,R,A,D,L,F
314	A	1.689	1	1.136	1.657	1	1	e		146/150	E,T,M,I,A,L,D,K,G,R,S,N,Q,Y,P,H
315	R	2.642	1	1.136	3.044	1	1	e		57/150	E,L,D,V,W,K,N,Q,S,H,P,R,I
316	R	0.802	2	0.354	1.136	4	1	e		75/150	T,E,A,D,V,M,K,G,Q,N,S,I,R
317	E	0.549	3	0.191	0.8	4	2	e		132/150	R,S,N,Q,P,H,K,G,V,W,D,A,E
318	A	-0.37	6	-0.579	-0.272	7	6	b		147/150
319	F	-0.93	8	-1.055	-0.853	9	8	b		148/150
320	K	1.406	1	0.8	1.657	2	1	e		147/150	T,E,A,D,L,F,V,K,M,H,S,Y,Q,I
321	T	-0.422	7	-0.579	-0.272	7	6	b		148/150
322	S	-0.409	6	-0.579	-0.272	7	6	e		148/150
323	S	-0.566	7	-0.754	-0.438	8	7	b		148/150
324	R	-1.084	9	-1.181	-1.055	9	9	e	f	148/150	L,R,V,K
325	N	-0.339	6	-0.511	-0.272	7	6	e		148/150
326	A	-1.124	9	-1.208	-1.09	9	9	b	s	148/150	A,S,D
327	L	0.517	3	0.191	0.8	4	2	e		148/150	K,M,V,R,I,S,Q,N,E,A,T,L
328	N	0.249	4	-0.069	0.354	5	4	e		148/150	L,D,A,E,T,N,Q,S,R,I,V,M,G,K
329	V	-0.791	8	-0.941	-0.699	8	8	b		148/150
330	S	-0.92	8	-1.019	-0.853	9	8	b		148/150
331	Q	-0.301	6	-0.511	-0.176	7	6	e		148/150
332	A	-0.911	8	-1.019	-0.853	9	8	e	f	148/150	R,S,Y,N,K,T,A
333	W	-1.17	9	-1.254	-1.122	9	9	b	s	148/150	W
334	R	-1.199	9	-1.254	-1.181	9	9	e	f	148/150	R,G
335	H	0.239	4	-0.069	0.354	5	4	e		148/150	T,E,D,L,F,W,V,K,M,H,S,N,Q,R
336	A	0.8	2	0.354	1.136	4	1	e		148/150	E,T,M,I,A,L,D,F,V,K,G,S,N,Q,H,R
337	L	-0.8	8	-0.941	-0.699	8	8	b		148/150
338	P	-0.03	5	-0.272	0.191	6	4	e		148/150	D,L,T,A,P,H,N,Q,S,K,G
339	F	0.233	4	-0.069	0.354	5	4	e		148/150	V,I,F,H,L,Y
340	A	0.796	2	0.354	1.136	4	1	e		148/150	G,K,I,R,P,H,Y,N,Q,S,T,A,E,D,L
341	K	-0.388	6	-0.579	-0.272	7	6	e		148/150
342	I	-0.835	8	-0.941	-0.754	8	8	b		148/150
343	R	0.587	3	0.191	0.8	4	2	e		148/150	D,L,T,E,A,I,R,H,N,S,Y,Q,K,V
344	R	0.25	4	-0.069	0.354	5	4	e		148/150	R,Q,Y,H,K,M,V,F,L,A,E,T
345	V	-0.299	6	-0.511	-0.176	7	6	b		148/150
346	Q	-1.164	9	-1.233	-1.122	9	9	e	f	148/150	Q,E
347	E	1.272	1	0.8	1.657	2	1	e		148/150	V,G,K,S,N,Q,R,A,E,T,L,D
348	L	0.053	5	-0.176	0.191	6	4	b		148/150	L,F,A,Y,I,V,K,M
349	C	-1.209	9	-1.263	-1.181	9	9	b	s	148/150	C
350	A	0.959	2	0.551	1.136	3	1	e		147/150	L,X,E,A,T,Q,N,Y,S,H,P,R,K,G
351	G	1.045	1	0.551	1.136	3	1	e		148/150	K,G,R,N,Q,S,H,P,E,A,T,L,D
352	A	-0.617	7	-0.754	-0.511	8	7	b		148/150
353	L	-0.97	9	-1.09	-0.898	9	8	b	s	148/150	I,F,L,M
354	Q	1.181	1	0.551	1.657	3	1	e		148/150	S,N,Q,H,R,V,W,K,G,L,D,A,E,T
355	L	0.433	3	0.053	0.551	5	3	b		148/150	T,E,L,W,V,M,Q,N,Y,I,R
356	L	-0.563	7	-0.754	-0.438	8	7	b		148/150
357	G	-0.889	8	-1.019	-0.804	9	8	b		148/150
358	Y	-1.212	9	-1.263	-1.181	9	9	b	s	148/150	Y
359	R	0.876	2	0.354	1.136	4	1	e		148/150	T,E,F,D,L,G,K,I,R,H,N,S,Q
360	P	0.869	2	0.354	1.136	4	1	e		143/150	T,A,E,L,F,V,K,M,H,P,S,Q,I,R
361	V	-0.373	6	-0.579	-0.272	7	6	b		143/150
362	Y	2.9	1	1.657	3.044	1	1	e		142/150	M,T,E,K,G,R,P,H,Y,S,Q,N,A,F,D,L
363	S	-0.961	8	-1.055	-0.898	9	8	e	f	142/150	H,D,S,N,T,A
364	E	0.331	4	0.053	0.551	5	3	e		142/150	V,K,P,S,Q,I,E,A,D,L
365	D	1.818	1	1.136	1.657	1	1	e		142/150	S,Q,N,H,R,I,V,W,G,K,L,D,A,E,T
366	E	-0.445	7	-0.641	-0.359	7	6	e		142/150
367	Q	-0.954	8	-1.055	-0.898	9	8	e	f	142/150	A,V,R,Q,L
368	R	-0.006	5	-0.272	0.191	6	4	e		141/150	T,A,Q,S,N,R,K,G
369	N	-0.201	6	-0.438	-0.069	7	5	e		140/150
370	L	-0.029	5	-0.272	0.191	6	4	b		140/150	V,M,H,Y,Q,I,R,A,L,F
371	A	-0.22	6	-0.438	-0.069	7	5	e		140/150
372	L	0.773	2	0.354	1.136	4	1	e		139/150	L,F,T,E,A,H,Y,Q,I,R,V,K,M
373	D	-0.551	7	-0.699	-0.438	8	7	e		139/150
374	L	-0.678	7	-0.853	-0.579	8	7	b		137/150
375	V	-0.059	5	-0.359	0.053	6	5	b		127/150	A,T,F,L,M,V,I,Y
376	L	0.835	2	0.354	1.136	4	1	e		103/150	K,M,V,R,I,Q,S,N,A,E,T,F,L,D
377	P	-0.128	5	-0.438	0.053	7	5	e		96/150	T,A,E,D,L,V,G,P,S,R
378	R	0.248	4	-0.069	0.551	5	3	e		89/150	K,G,R,Q,S,H,E,L
379	G	1.132	1	0.551	1.657	3	1	e		71/150	A,E,T,D,K,G,V,R,Q,S,H
380	L	1.772	1	0.8	1.657	2	1	e		55/150	F,L,T,R,N,Q,P,H,M,K
381	N	2.78	1	1.657	3.044	1	1	e		50/150	I,Y,S,N,H,K,G,F,D,E,T
382	G	1.066	1	0.551	1.657	3	1	e		48/150	D,E,R,H,P,S,N,Q,K,G
383	F	-0.562	7	-0.853	-0.359	8	6	b		48/150
384	T	0.56	3	0.053	0.8	5	2	e		48/150	R,I,Q,N,S,K,M,D,E,A,T
385	W	-1.014	9	-1.233	-0.898	9	8	b	s	48/150	W
386	A	2.514	1	1.136	3.044	1	1	e		48/150	T,E,A,L,V,K,G,P,S,N,I
387	S	-0.148	6	-0.511	0.053	7	5	e		46/150	A,V,N,Q,S,P
388	S	0.209	4	-0.176	0.551	6	3	e		39/150	R,Q,Y,S,P,G,F,D,A,T
389	T	0.108	5	-0.359	0.354	6	4	e		31/150	T,M,G,K,N,S
390	A	1.643	1	0.551	3.044	3	1	e		26/150	A,E,T,K,S,D,P
391	S	2.254	1	1.136	3.044	1	1	e		21/150	A,E,T,D,V,K,S,Q
392	H	0.822	2	0.053	1.136	5	1	e		16/150	K,R,P,H,Q
393	P	-0.468	7	-0.941	-0.176	8	6	e		13/150
394	R	1.353	1	0.191	3.044	4	1	e		7/150	R,N,G,E
395	N	-0.839	8	-1.181	-0.699	9	8	e	f	3/150	N
