# Supplementary material for: A comprehensive evaluation of 181 reported CHST6 variants in patients with macular corneal dystrophy
Source: Aging (Albany NY). 2019 Feb 4;11(3):1019–29. doi: 10.18632/aging.101807 (PMC6382428; doi:10.18632/aging.101807)
Supplement: Supplementary Table 2 [file aging-11-101807-s002.xlsx]

## Sheet: 工作表1
Table S2. ACMG classification for missense variants in CHST6 gene																	Table S2. ACMG classification for missense variants in CHST6 gene.
Nucleotide change (NM_021615.4)	Amino acid change	Genomic coordinates (GRCh37/hg19）	Nature of effect	ACMG		PVS1	PS1	PS2	PS3	PS4	PM1	PM2	PM3	PM4	PM5	PM6	PP1	PP2	PP3	PP4	PP5	BA1	BS1	BS2	BS3	BS4	BP1	BP2	BP3	BP4	BP5	BP6	BP7
c.1A>T	M1L	16:75513726	missense	VUS	PM2+PP2+PP3							Allele not found in Broad gnomAD exomes despite good coverage=40 (greater than 20).Allele is not covered in Broad gnomAD genomes.						Missense variant in gene CHST6 which has 65 pathogenic missense variants vs 2 benign missense variants (ratio=32.5 is greater than 3 threshold), associated with the following conditions: Macular dystrophy, corneal, 1 and Macular dystrophy, corneal, 2.	Pathogenic computational verdict because 5 pathogenic predictions from GERP, dbNSFP.FATHMM, MetaLR, MetaSVM and MutationTaster (vs 2 benign predictions from LRT and PROVEAN)
c.7C>A	L3M	16:75513720	missense	VUS	PM2+PP2							Broad gnomAD exomes allele frequency=0.000047 is smaller than 0.0001 (threshold for recessive gene CHST6).Allele is not covered in Broad gnomAD genomes.						Missense variant in gene CHST6 which has 65 pathogenic missense variants vs 2 benign missense variants (ratio=32.5 is greater than 3 threshold), associated with the following conditions: Macular dystrophy, corneal, 1 and Macular dystrophy, corneal, 2.
c.13C>T	R5C	16:75513714	missense	VUS	PM2+PP2+PP3							Broad gnomAD exomes allele frequency=0.000000 is smaller than 0.0001 (threshold for recessive gene CHST6).Allele is not covered in Broad gnomAD genomes.						Missense variant in gene CHST6 which has 65 pathogenic missense variants vs 2 benign missense variants (ratio=32.5 is greater than 3 threshold), associated with the following conditions: Macular dystrophy, corneal, 1 and Macular dystrophy, corneal, 2.	Pathogenic computational verdict because 7 pathogenic predictions from DANN, GERP, dbNSFP.FATHMM, LRT, MetaLR, MetaSVM and MutationAssessor (vs 2 benign predictions from MutationTaster and PROVEAN).
c.44T>C	L15P	16:75513683	missense	VUS	PM2+PP2+PP3+PP5							Allele not found in Broad gnomAD exomes despite good coverage=43 (greater than 20).Allele is not covered in Broad gnomAD genomes.						Missense variant in gene CHST6 which has 65 pathogenic missense variants vs 2 benign missense variants (ratio=32.5 is greater than 3 threshold), associated with the following conditions: Macular dystrophy, corneal, 1 and Macular dystrophy, corneal, 2.	Pathogenic computational verdict because 7 pathogenic predictions from DANN, GERP, dbNSFP.FATHMM, MetaLR, MetaSVM, MutationAssessor and MutationTaster (vs 2 benign predictions from LRT and PROVEAN).		UniProt classifies this variant as 'disease' (Macular Dystrophy, Corneal).
c.65T>C	L22P	16:75513666	missense	LP	PM2+PM5+PP2+PP3							Allele is not covered in Broad gnomAD genomes.			Another amino-acid missense variant at this position, Leu22Arg (chr16:75513662 A⇒C), is classified as 'disease' (Macular Dystrophy, Corneal) by UniProt.			Missense variant in gene CHST6 which has 65 pathogenic missense variants vs 2 benign missense variants (ratio=32.5 is greater than 3 threshold), associated with the following conditions: Macular dystrophy, corneal, 1 and Macular dystrophy, corneal, 2.	Pathogenic computational verdict because 8 pathogenic predictions from DANN, GERP, dbNSFP.FATHMM, MetaLR, MetaSVM, MutationAssessor, MutationTaster and PROVEAN (vs 1 benign prediction from LRT).
c.65T>G	L22R	16:75513662	missense	P	PS1+PM2+PP2+PP3+PP5		Leu22Arg (chr16:75513662 A⇒C), is classified as 'disease' (Macular Dystrophy, Corneal) by UniProt.					Allele is not covered in Broad gnomAD genomes.						Missense variant in gene CHST6 which has 65 pathogenic missense variants vs 2 benign missense variants (ratio=32.5 is greater than 3 threshold), associated with the following conditions: Macular dystrophy, corneal, 1 and Macular dystrophy, corneal, 2.	Pathogenic computational verdict because 7 pathogenic predictions from DANN, GERP, dbNSFP.FATHMM, MetaLR, MetaSVM, MutationAssessor and MutationTaster (vs 2 benign predictions from LRT and PROVEAN).		UniProt classifies this variant as 'disease' (Macular Dystrophy, Corneal).
c.91C>T	P31S	16:75513636	missense	LP	PS1+PM2+PP2+PP5		The equivalent amino-acid variant Pro31Ser (chr16:75513635 GG⇒CT) is classified as 'disease' (Macular Dystrophy, Corneal) by UniProt.					Allele is not covered in Broad gnomAD genomes.						Missense variant in gene CHST6 which has 65 pathogenic missense variants vs 2 benign missense variants (ratio=32.5 is greater than 3 threshold), associated with the following conditions: Macular dystrophy, corneal, 1 and Macular dystrophy, corneal, 2.			UniProt classifies this variant as 'disease' (Macular Dystrophy, Corneal).
c.92C>T	P31L	16:75513635	missense	LP	PM2+PM5+PP2+BP4							Allele is not covered in Broad gnomAD genomes.			Another amino-acid missense variant at this position, Pro31Ser (chr16:75513636 G⇒A), is classified as 'disease' (Macular Dystrophy, Corneal) by UniProt.			Missense variant in gene CHST6 which has 65 pathogenic missense variants vs 2 benign missense variants (ratio=32.5 is greater than 3 threshold), associated with the following conditions: Macular dystrophy, corneal, 1 and Macular dystrophy, corneal, 2.
c.124C>T	H42Y	16:75513603	missense	LP	PM1+PM2+PP2+PP3+PP5						Located in a mutational hot spot and/or critical and well-established functional domain (e.g., active site of an enzyme) without benign variation （sulfotransferase domain)	Allele is not covered in Broad gnomAD genomes.						Missense variant in gene CHST6 which has 65 pathogenic missense variants vs 2 benign missense variants (ratio=32.5 is greater than 3 threshold), associated with the following conditions: Macular dystrophy, corneal, 1 and Macular dystrophy, corneal, 2.	Pathogenic computational verdict because 9 pathogenic predictions from DANN, GERP, dbNSFP.FATHMM, LRT, MetaLR, MetaSVM, MutationAssessor, MutationTaster and PROVEAN (vs no benign predictions).		UniProt classifies this variant as 'disease' (Macular Dystrophy, Corneal).
c.137T>C	L46P	16:75513590	missense	LP	PM1+PM2+PP2+PP3						Located in a mutational hot spot and/or critical and well-established functional domain (e.g., active site of an enzyme) without benign variation （sulfotransferase domain)	Allele is not covered in Broad gnomAD genomes.						Missense variant in gene CHST6 which has 65 pathogenic missense variants vs 2 benign missense variants (ratio=32.5 is greater than 3 threshold), associated with the following conditions: Macular dystrophy, corneal, 1 and Macular dystrophy, corneal, 2.	Pathogenic computational verdict because 9 pathogenic predictions from DANN, GERP, dbNSFP.FATHMM, LRT, MetaLR, MetaSVM, MutationAssessor, MutationTaster and PROVEAN (vs no benign predictions).
c.148C>T	R50C	16:75513579	missense	P	PS1+PM1+PM2+PP2+PP3		Arg50Cys (chr16:75513579 G⇒A), is classified as 'disease' (Macular Dystrophy, Corneal) by UniProt.				Located in a mutational hot spot and/or critical and well-established functional domain (e.g., active site of an enzyme) without benign variation （sulfotransferase domain)	Allele is not covered in Broad gnomAD genomes.						Missense variant in gene CHST6 which has 65 pathogenic missense variants vs 2 benign missense variants (ratio=32.5 is greater than 3 threshold), associated with the following conditions: Macular dystrophy, corneal, 1 and Macular dystrophy, corneal, 2.	Pathogenic computational verdict because 9 pathogenic predictions from DANN, GERP, dbNSFP.FATHMM, LRT, MetaLR, MetaSVM, MutationAssessor, MutationTaster and PROVEAN (vs no benign predictions).		UniProt classifies this variant as 'disease' (Macular Dystrophy, Corneal).
c.148C>A	R50S	16:75513579	missense	LP	PM1+PM2+PM5+PP2+PP3						Located in a mutational hot spot and/or critical and well-established functional domain (e.g., active site of an enzyme) without benign variation （sulfotransferase domain)	Allele is not covered in Broad gnomAD genomes.			Another amino-acid missense variant at this position, Arg50Cys (chr16:75513579 G⇒A), is classified as 'disease' (Macular Dystrophy, Corneal) by UniProt.			Missense variant in gene CHST6 which has 65 pathogenic missense variants vs 2 benign missense variants (ratio=32.5 is greater than 3 threshold), associated with the following conditions: Macular dystrophy, corneal, 1 and Macular dystrophy, corneal, 2.	Pathogenic computational verdict because 9 pathogenic predictions from DANN, GERP, dbNSFP.FATHMM, LRT, MetaLR, MetaSVM, MutationAssessor, MutationTaster and PROVEAN (vs no benign predictions).
C.149G>T	R50L	16:75513578	missense	LP	PM1+PM2+PM5+PP2+PP3						Located in a mutational hot spot and/or critical and well-established functional domain (e.g., active site of an enzyme) without benign variation （sulfotransferase domain)	Broad gnomAD genomes allele frequency=0.000065 is smaller than 0.0001 (threshold for recessive gene CHST6).			Another amino-acid missense variant at this position, Arg50Cys (chr16:75513579 G⇒A), is classified as 'disease' (Macular Dystrophy, Corneal) by UniProt.			Missense variant in gene CHST6 which has 65 pathogenic missense variants vs 2 benign missense variants (ratio=32.5 is greater than 3 threshold), associated with the following conditions: Macular dystrophy, corneal, 1 and Macular dystrophy, corneal, 2.	Pathogenic computational verdict because 9 pathogenic predictions from DANN, GERP, dbNSFP.FATHMM, LRT, MetaLR, MetaSVM, MutationAssessor, MutationTaster and PROVEAN (vs no benign predictions).
C.152C>T	S51L	16:75513575	missense	LP	PM1+PM2+PP2+PP3+PP5						Located in a mutational hot spot and/or critical and well-established functional domain (e.g., active site of an enzyme) without benign variation （sulfotransferase domain)	Broad gnomAD genomes allele frequency=0.000032 is smaller than 0.0001 (threshold for recessive gene CHST6).						Missense variant in gene CHST6 which has 65 pathogenic missense variants vs 2 benign missense variants (ratio=32.5 is greater than 3 threshold), associated with the following conditions: Macular dystrophy, corneal, 1 and Macular dystrophy, corneal, 2.	Pathogenic computational verdict because 9 pathogenic predictions from DANN, GERP, dbNSFP.FATHMM, LRT, MetaLR, MetaSVM, MutationAssessor, MutationTaster and PROVEAN (vs no benign predictions).		UniProt classifies this variant as 'disease' (Macular Dystrophy, Corneal).
C.155G>A	G52D	16:75513572	missense	LP	PM1+PM2+PP2+PP3+PP5						Located in a mutational hot spot and/or critical and well-established functional domain (e.g., active site of an enzyme) without benign variation （sulfotransferase domain)	Allele is not covered in Broad gnomAD genomes.						Missense variant in gene CHST6 which has 65 pathogenic missense variants vs 2 benign missense variants (ratio=32.5 is greater than 3 threshold), associated with the following conditions: Macular dystrophy, corneal, 1 and Macular dystrophy, corneal, 2.	Pathogenic computational verdict because 9 pathogenic predictions from DANN, GERP, dbNSFP.FATHMM, LRT, MetaLR, MetaSVM, MutationAssessor, MutationTaster and PROVEAN (vs no benign predictions).		UniProt classifies this variant as 'disease' (Macular Dystrophy, Corneal).
c.158C>T	S53L	16:75513569	missense	LP	PM1+PM2+PP2+PP3+PP5						Located in a mutational hot spot and/or critical and well-established functional domain (e.g., active site of an enzyme) without benign variation （sulfotransferase domain)	Allele is not covered in Broad gnomAD genomes.						Missense variant in gene CHST6 which has 65 pathogenic missense variants vs 2 benign missense variants (ratio=32.5 is greater than 3 threshold), associated with the following conditions: Macular dystrophy, corneal, 1 and Macular dystrophy, corneal, 2.	Pathogenic computational verdict because 9 pathogenic predictions from DANN, GERP, dbNSFP.FATHMM, LRT, MetaLR, MetaSVM, MutationAssessor, MutationTaster and PROVEAN (vs no benign predictions).		UniProt classifies this variant as 'disease' (Macular Dystrophy, Corneal).
c.161C>A	S54Y	16:75513566	missense	LP	PM1+PM2+PP2+PP3						Located in a mutational hot spot and/or critical and well-established functional domain (e.g., active site of an enzyme) without benign variation （sulfotransferase domain)	Allele is not covered in Broad gnomAD genomes.						Missense variant in gene CHST6 which has 65 pathogenic missense variants vs 2 benign missense variants (ratio=32.5 is greater than 3 threshold), associated with the following conditions: Macular dystrophy, corneal, 1 and Macular dystrophy, corneal, 2.	Pathogenic computational verdict because 9 pathogenic predictions from DANN, GERP, dbNSFP.FATHMM, LRT, MetaLR, MetaSVM, MutationAssessor, MutationTaster and PROVEAN (vs no benign predictions).
c.161C>T	S54F	16:75513566	missense	LP	PM1+PM2+PP2+PP3						Located in a mutational hot spot and/or critical and well-established functional domain (e.g., active site of an enzyme) without benign variation （sulfotransferase domain)	Allele is not covered in Broad gnomAD genomes.						Missense variant in gene CHST6 which has 65 pathogenic missense variants vs 2 benign missense variants (ratio=32.5 is greater than 3 threshold), associated with the following conditions: Macular dystrophy, corneal, 1 and Macular dystrophy, corneal, 2.	Pathogenic computational verdict because 9 pathogenic predictions from DANN, GERP, dbNSFP.FATHMM, LRT, MetaLR, MetaSVM, MutationAssessor, MutationTaster and PROVEAN (vs no benign predictions).
c.164T>C	F55S	16:75513563	missense	LP	PM1+PM2+PP2+PP3						Located in a mutational hot spot and/or critical and well-established functional domain (e.g., active site of an enzyme) without benign variation （sulfotransferase domain)	Allele is not covered in Broad gnomAD genomes.						Missense variant in gene CHST6 which has 65 pathogenic missense variants vs 2 benign missense variants (ratio=32.5 is greater than 3 threshold), associated with the following conditions: Macular dystrophy, corneal, 1 and Macular dystrophy, corneal, 2.	Pathogenic computational verdict because 9 pathogenic predictions from DANN, GERP, dbNSFP.FATHMM, LRT, MetaLR, MetaSVM, MutationAssessor, MutationTaster and PROVEAN (vs no benign predictions).
c.165C>A	F55L	16:75513562	missense	LP	PM1+PM2+PP2+PP3						Located in a mutational hot spot and/or critical and well-established functional domain (e.g., active site of an enzyme) without benign variation （sulfotransferase domain)	Allele is not covered in Broad gnomAD genomes.						Missense variant in gene CHST6 which has 65 pathogenic missense variants vs 2 benign missense variants (ratio=32.5 is greater than 3 threshold), associated with the following conditions: Macular dystrophy, corneal, 1 and Macular dystrophy, corneal, 2.	Pathogenic computational verdict because 9 pathogenic predictions from DANN, GERP, dbNSFP.FATHMM, LRT, MetaLR, MetaSVM, MutationAssessor, MutationTaster and PROVEAN (vs no benign predictions).
c.166G>A;c.167T>G	V56R	16:75513560-75513561	missense	LP	PM1+PM2+PP2+PP3						Located in a mutational hot spot and/or critical and well-established functional domain (e.g., active site of an enzyme) without benign variation （sulfotransferase domain)	Allele is not covered in Broad gnomAD genomes.						Missense variant in gene CHST6 which has 65 pathogenic missense variants vs 2 benign missense variants (ratio=32.5 is greater than 3 threshold), associated with the following conditions: Macular dystrophy, corneal, 1 and Macular dystrophy, corneal, 2.	Pathogenic computational verdict because 9 pathogenic predictions from DANN, GERP, dbNSFP.FATHMM, LRT, MetaLR, MetaSVM, MutationAssessor, MutationTaster and PROVEAN (vs no benign predictions).
c.173A>G	Q58R	16:75513554	missense	LP	PM1+PM2+PP2+PP3						Located in a mutational hot spot and/or critical and well-established functional domain (e.g., active site of an enzyme) without benign variation （sulfotransferase domain)	Allele is not covered in Broad gnomAD genomes.						Missense variant in gene CHST6 which has 65 pathogenic missense variants vs 2 benign missense variants (ratio=32.5 is greater than 3 threshold), associated with the following conditions: Macular dystrophy, corneal, 1 and Macular dystrophy, corneal, 2.	Pathogenic computational verdict because 9 pathogenic predictions from DANN, GERP, dbNSFP.FATHMM, LRT, MetaLR, MetaSVM, MutationAssessor, MutationTaster and PROVEAN (vs no benign predictions).
C.176T>C	L59P	16:75513551	missense	P	PS1+PM1+PM2+PP2+PP3		Leu59Pro (chr16:75513551 A⇒G), is classified as 'disease' (Macular Dystrophy, Corneal) by UniProt.				Located in a mutational hot spot and/or critical and well-established functional domain (e.g., active site of an enzyme) without benign variation （sulfotransferase domain)	Allele is not covered in Broad gnomAD genomes.						Missense variant in gene CHST6 which has 65 pathogenic missense variants vs 2 benign missense variants (ratio=32.5 is greater than 3 threshold), associated with the following conditions: Macular dystrophy, corneal, 1 and Macular dystrophy, corneal, 2.	Pathogenic computational verdict because 9 pathogenic predictions from DANN, GERP, dbNSFP.FATHMM, LRT, MetaLR, MetaSVM, MutationAssessor, MutationTaster and PROVEAN (vs no benign predictions).
c.176T>A	L59H	16:75513551	missense	LP	PM1+PM2+PM5+PP2+PP3						Located in a mutational hot spot and/or critical and well-established functional domain (e.g., active site of an enzyme) without benign variation （sulfotransferase domain)	Allele is not covered in Broad gnomAD genomes.			Another amino-acid missense variant at this position, Leu59Pro (chr16:75513551 A⇒G), is classified as 'disease' (Macular Dystrophy, Corneal) by UniProt.			Missense variant in gene CHST6 which has 65 pathogenic missense variants vs 2 benign missense variants (ratio=32.5 is greater than 3 threshold), associated with the following conditions: Macular dystrophy, corneal, 1 and Macular dystrophy, corneal, 2.	Pathogenic computational verdict because 9 pathogenic predictions from DANN, GERP, dbNSFP.FATHMM, LRT, MetaLR, MetaSVM, MutationAssessor, MutationTaster and PROVEAN (vs no benign predictions).
C.182A>C	N61T	16:75513545	missense	P	PS1+PM1+PM2+PP2+PP5		Asn61Thr (chr16:75513545 T⇒G), is classified as 'disease' (Macular Dystrophy, Corneal) by UniProt.				Located in a mutational hot spot and/or critical and well-established functional domain (e.g., active site of an enzyme) without benign variation （sulfotransferase domain)	Allele is not covered in Broad gnomAD genomes.						Missense variant in gene CHST6 which has 65 pathogenic missense variants vs 2 benign missense variants (ratio=32.5 is greater than 3 threshold), associated with the following conditions: Macular dystrophy, corneal, 1 and Macular dystrophy, corneal, 2.			UniProt classifies this variant as 'disease' (Macular Dystrophy, Corneal).
C.183C>A	N61K	16:75513544	missense	LP	PM1+PM2+PM5+PP2+PP3						Located in a mutational hot spot and/or critical and well-established functional domain (e.g., active site of an enzyme) without benign variation （sulfotransferase domain)	Allele is not covered in Broad gnomAD genomes.			Another amino-acid missense variant at this position, Asn61Thr (chr16:75513545 T⇒G), is classified as 'disease' (Macular Dystrophy, Corneal) by UniProt.			Missense variant in gene CHST6 which has 65 pathogenic missense variants vs 2 benign missense variants (ratio=32.5 is greater than 3 threshold), associated with the following conditions: Macular dystrophy, corneal, 1 and Macular dystrophy, corneal, 2.	Pathogenic computational verdict because 9 pathogenic predictions from DANN, GERP, dbNSFP.FATHMM, LRT, MetaLR, MetaSVM, MutationAssessor, MutationTaster and PROVEAN (vs no benign predictions).
c.189C>G	H63Q	16:75513538	missense	LP	PM1+PM2+PP2+PP3						Located in a mutational hot spot and/or critical and well-established functional domain (e.g., active site of an enzyme) without benign variation （sulfotransferase domain)	Allele is not covered in Broad gnomAD genomes.						Missense variant in gene CHST6 which has 65 pathogenic missense variants vs 2 benign missense variants (ratio=32.5 is greater than 3 threshold), associated with the following conditions: Macular dystrophy, corneal, 1 and Macular dystrophy, corneal, 2.	Pathogenic computational verdict because 9 pathogenic predictions from DANN, GERP, dbNSFP.FATHMM, LRT, MetaLR, MetaSVM, MutationAssessor, MutationTaster and PROVEAN (vs no benign predictions).
c.191C>T	P64L	16:75513536	missense	LP	PM1+PM2+PP2+PP3						Located in a mutational hot spot and/or critical and well-established functional domain (e.g., active site of an enzyme) without benign variation （sulfotransferase domain)	Allele is not covered in Broad gnomAD genomes.						Missense variant in gene CHST6 which has 65 pathogenic missense variants vs 2 benign missense variants (ratio=32.5 is greater than 3 threshold), associated with the following conditions: Macular dystrophy, corneal, 1 and Macular dystrophy, corneal, 2.	Pathogenic computational verdict because 9 pathogenic predictions from DANN, GERP, dbNSFP.FATHMM, LRT, MetaLR, MetaSVM, MutationAssessor, MutationTaster and PROVEAN (vs no benign predictions).
C.196G>C	V66L	16:75513531	missense	P	PS1+PM1+PM2+PP2+PP3+PP5		The equivalent amino-acid variant Val66Leu (chr16:75513529 GAC⇒TAA) is classified as 'disease' (Macular Dystrophy, Corneal) by UniProt.				Located in a mutational hot spot and/or critical and well-established functional domain (e.g., active site of an enzyme) without benign variation （sulfotransferase domain)	Allele is not covered in Broad gnomAD genomes.						Missense variant in gene CHST6 which has 65 pathogenic missense variants vs 2 benign missense variants (ratio=32.5 is greater than 3 threshold), associated with the following conditions: Macular dystrophy, corneal, 1 and Macular dystrophy, corneal, 2.	Pathogenic computational verdict because 9 pathogenic predictions from DANN, GERP, dbNSFP.FATHMM, LRT, MetaLR, MetaSVM, MutationAssessor, MutationTaster and PROVEAN (vs no benign predictions).		UniProt classifies this variant as 'disease' (Macular Dystrophy, Corneal).
C.196G>T	V66F	16:75513531	missense	LP	PM1+PM2+PM5+PP2+PP3						Located in a mutational hot spot and/or critical and well-established functional domain (e.g., active site of an enzyme) without benign variation （sulfotransferase domain)	Allele is not covered in Broad gnomAD genomes.			Another amino-acid missense variant at this position, Val66Leu (chr16:75513531 C⇒G), is classified as 'disease' (Macular Dystrophy, Corneal) by UniProt.			Missense variant in gene CHST6 which has 65 pathogenic missense variants vs 2 benign missense variants (ratio=32.5 is greater than 3 threshold), associated with the following conditions: Macular dystrophy, corneal, 1 and Macular dystrophy, corneal, 2.	Pathogenic computational verdict because 9 pathogenic predictions from DANN, GERP, dbNSFP.FATHMM, LRT, MetaLR, MetaSVM, MutationAssessor, MutationTaster and PROVEAN (vs no benign predictions).
c.202T>C	Y68H	16:75513525	missense	LP	PM1+PM2+PP2+PP3						Located in a mutational hot spot and/or critical and well-established functional domain (e.g., active site of an enzyme) without benign variation （sulfotransferase domain)	Allele is not covered in Broad gnomAD genomes.						Missense variant in gene CHST6 which has 65 pathogenic missense variants vs 2 benign missense variants (ratio=32.5 is greater than 3 threshold), associated with the following conditions: Macular dystrophy, corneal, 1 and Macular dystrophy, corneal, 2.	Pathogenic computational verdict because 9 pathogenic predictions from DANN, GERP, dbNSFP.FATHMM, LRT, MetaLR, MetaSVM, MutationAssessor, MutationTaster and PROVEAN (vs no benign predictions).
c.208A>T	M70L	16:75513519	missense	LP	PS1+PM1+PM2+PP2+PP3+PP5		The equivalent amino-acid variant Met70Leu (chr16:75513519 T⇒A) is classified as 'disease' (Macular Dystrophy, Corneal) by UniProt.				Located in a mutational hot spot and/or critical and well-established functional domain (e.g., active site of an enzyme) without benign variation （sulfotransferase domain)	Allele is not covered in Broad gnomAD genomes.						Missense variant in gene CHST6 which has 65 pathogenic missense variants vs 2 benign missense variants (ratio=32.5 is greater than 3 threshold), associated with the following conditions: Macular dystrophy, corneal, 1 and Macular dystrophy, corneal, 2.	Pathogenic computational verdict because 9 pathogenic predictions from DANN, GERP, dbNSFP.FATHMM, LRT, MetaLR, MetaSVM, MutationAssessor, MutationTaster and PROVEAN (vs no benign predictions).		UniProt classifies this variant as 'disease' (Macular Dystrophy, Corneal).
c.211G>C	E71Q	16:75513516	missense	LP	PM1+PM2+PP2+PP3						Located in a mutational hot spot and/or critical and well-established functional domain (e.g., active site of an enzyme) without benign variation （sulfotransferase domain)	Allele is not covered in Broad gnomAD genomes.						Missense variant in gene CHST6 which has 65 pathogenic missense variants vs 2 benign missense variants (ratio=32.5 is greater than 3 threshold), associated with the following conditions: Macular dystrophy, corneal, 1 and Macular dystrophy, corneal, 2.	Pathogenic computational verdict because 9 pathogenic predictions from DANN, GERP, dbNSFP.FATHMM, LRT, MetaLR, MetaSVM, MutationAssessor, MutationTaster and PROVEAN (vs no benign predictions).
c.214C>T	P72S	16:75513513	missense	LP	PS1+PM1+PM2+PP2+PP3+PP5		The equivalent amino-acid variant Pro72Ser (chr16:75513512 GG⇒CT) is classified as 'disease' (Macular Dystrophy, Corneal) by UniProt.				Located in a mutational hot spot and/or critical and well-established functional domain (e.g., active site of an enzyme) without benign variation （sulfotransferase domain)	Allele is not covered in Broad gnomAD genomes.						Missense variant in gene CHST6 which has 65 pathogenic missense variants vs 2 benign missense variants (ratio=32.5 is greater than 3 threshold), associated with the following conditions: Macular dystrophy, corneal, 1 and Macular dystrophy, corneal, 2.	Pathogenic computational verdict because 9 pathogenic predictions from DANN, GERP, dbNSFP.FATHMM, LRT, MetaLR, MetaSVM, MutationAssessor, MutationTaster and PROVEAN (vs no benign predictions).		UniProt classifies this variant as 'disease' (Macular Dystrophy, Corneal).
c.217G>C	A73P	16:75513510	missense	LP	PM1+PM2+PP2+PP3						Located in a mutational hot spot and/or critical and well-established functional domain (e.g., active site of an enzyme) without benign variation （sulfotransferase domain)	Allele is not covered in Broad gnomAD genomes.						Missense variant in gene CHST6 which has 65 pathogenic missense variants vs 2 benign missense variants (ratio=32.5 is greater than 3 threshold), associated with the following conditions: Macular dystrophy, corneal, 1 and Macular dystrophy, corneal, 2.	Pathogenic computational verdict because 9 pathogenic predictions from DANN, GERP, dbNSFP.FATHMM, LRT, MetaLR, MetaSVM, MutationAssessor, MutationTaster and PROVEAN (vs no benign predictions).
c.217G>A	A73T	16:75513510	missense	LP	PM1+PM2+PP2+PP3						Located in a mutational hot spot and/or critical and well-established functional domain (e.g., active site of an enzyme) without benign variation （sulfotransferase domain)	Allele is not covered in Broad gnomAD genomes.						Missense variant in gene CHST6 which has 65 pathogenic missense variants vs 2 benign missense variants (ratio=32.5 is greater than 3 threshold), associated with the following conditions: Macular dystrophy, corneal, 1 and Macular dystrophy, corneal, 2.	Pathogenic computational verdict because 9 pathogenic predictions from DANN, GERP, dbNSFP.FATHMM, LRT, MetaLR, MetaSVM, MutationAssessor, MutationTaster and PROVEAN (vs no benign predictions).
c.218C>T	A73V	16:75513509	missense	LP	PM1+PM2+PP2+PP3						Located in a mutational hot spot and/or critical and well-established functional domain (e.g., active site of an enzyme) without benign variation （sulfotransferase domain)	Allele is not covered in Broad gnomAD genomes.						Missense variant in gene CHST6 which has 65 pathogenic missense variants vs 2 benign missense variants (ratio=32.5 is greater than 3 threshold), associated with the following conditions: Macular dystrophy, corneal, 1 and Macular dystrophy, corneal, 2.	Pathogenic computational verdict because 9 pathogenic predictions from DANN, GERP, dbNSFP.FATHMM, LRT, MetaLR, MetaSVM, MutationAssessor, MutationTaster and PROVEAN (vs no benign predictions).
c.226G>A	V76M	16:75513501	missense	LP	PM1+PM2+PP2+PP3						Located in a mutational hot spot and/or critical and well-established functional domain (e.g., active site of an enzyme) without benign variation （sulfotransferase domain)	Allele is not covered in Broad gnomAD genomes.						Missense variant in gene CHST6 which has 65 pathogenic missense variants vs 2 benign missense variants (ratio=32.5 is greater than 3 threshold), associated with the following conditions: Macular dystrophy, corneal, 1 and Macular dystrophy, corneal, 2.	Pathogenic computational verdict because 9 pathogenic predictions from DANN, GERP, dbNSFP.FATHMM, LRT, MetaLR, MetaSVM, MutationAssessor, MutationTaster and PROVEAN (vs no benign predictions).
c.231G>A	W77X	16:75513496	missense	LP	PM1+PM2+PM4+PP3						Located in a mutational hot spot and/or critical and well-established functional domain (e.g., active site of an enzyme) without benign variation （sulfotransferase domain)	Allele is not covered in Broad gnomAD genomes.		Stop-gain variant in gene CHST6, and not in a repeat region (per UniProt).					Pathogenic computational verdict because 4 pathogenic predictions from DANN, GERP, LRT and MutationTaster (vs no benign predictions).
c.231G>C	W77C	16:75513496	missense	LP	PM1+PM2+PP2+PP3						Located in a mutational hot spot and/or critical and well-established functional domain (e.g., active site of an enzyme) without benign variation （sulfotransferase domain)	Allele is not covered in Broad gnomAD genomes.						Missense variant in gene CHST6 which has 65 pathogenic missense variants vs 2 benign missense variants (ratio=32.5 is greater than 3 threshold), associated with the following conditions: Macular dystrophy, corneal, 1 and Macular dystrophy, corneal, 2.	Pathogenic computational verdict because 9 pathogenic predictions from DANN, GERP, dbNSFP.FATHMM, LRT, MetaLR, MetaSVM, MutationAssessor, MutationTaster and PROVEAN (vs no benign predictions).
c.274G>C	V92L	16:75513453	missense	LP	PM1+PM2+PP2+PP3						Located in a mutational hot spot and/or critical and well-established functional domain (e.g., active site of an enzyme) without benign variation （sulfotransferase domain)	Allele is not covered in Broad gnomAD genomes.						Missense variant in gene CHST6 which has 65 pathogenic missense variants vs 2 benign missense variants (ratio=32.5 is greater than 3 threshold), associated with the following conditions: Macular dystrophy, corneal, 1 and Macular dystrophy, corneal, 2.	Pathogenic computational verdict because 9 pathogenic predictions from DANN, GERP, dbNSFP.FATHMM, LRT, MetaLR, MetaSVM, MutationAssessor, MutationTaster and PROVEAN (vs no benign predictions).
c.277C>A	R93S	16:75513450	missense	LP	PM1+PM2+PM5+PP2+PP3						Located in a mutational hot spot and/or critical and well-established functional domain (e.g., active site of an enzyme) without benign variation （sulfotransferase domain)	Allele is not covered in Broad gnomAD genomes.			Another amino-acid missense variant at this position, Arg93His (chr16:75513449 C⇒T), is classified as 'disease' (Macular Dystrophy, Corneal) by UniProt.			Missense variant in gene CHST6 which has 65 pathogenic missense variants vs 2 benign missense variants (ratio=32.5 is greater than 3 threshold), associated with the following conditions: Macular dystrophy, corneal, 1 and Macular dystrophy, corneal, 2.	Pathogenic computational verdict because 9 pathogenic predictions from DANN, GERP, dbNSFP.FATHMM, LRT, MetaLR, MetaSVM, MutationAssessor, MutationTaster and PROVEAN (vs no benign predictions).
c.278G>A	R93H	16:75513449	missense	P	PS1+PM1+PM2+PP2+PP3+PP5		Arg93His (chr16:75513449 C⇒T), is classified as 'disease' (Macular Dystrophy, Corneal) by UniProt.				Located in a mutational hot spot and/or critical and well-established functional domain (e.g., active site of an enzyme) without benign variation （sulfotransferase domain)	Allele is not covered in Broad gnomAD genomes.						Missense variant in gene CHST6 which has 65 pathogenic missense variants vs 2 benign missense variants (ratio=32.5 is greater than 3 threshold), associated with the following conditions: Macular dystrophy, corneal, 1 and Macular dystrophy, corneal, 2.	Pathogenic computational verdict because 9 pathogenic predictions from DANN, GERP, dbNSFP.FATHMM, LRT, MetaLR, MetaSVM, MutationAssessor, MutationTaster and PROVEAN (vs no benign predictions).		UniProt classifies this variant as 'disease' (Macular Dystrophy, Corneal).
c.289C>T	R97C	16:75513438	missense	LP	PM1+PM2+PM5+PP2+PP3						Located in a mutational hot spot and/or critical and well-established functional domain (e.g., active site of an enzyme) without benign variation （sulfotransferase domain)	Allele is not covered in Broad gnomAD genomes.			Another amino-acid missense variant at this position, Arg97Pro (chr16:75513437 C⇒G), is classified as 'disease' (Macular Dystrophy, Corneal) by UniProt.			Missense variant in gene CHST6 which has 65 pathogenic missense variants vs 2 benign missense variants (ratio=32.5 is greater than 3 threshold), associated with the following conditions: Macular dystrophy, corneal, 1 and Macular dystrophy, corneal, 2.	Pathogenic computational verdict because 9 pathogenic predictions from DANN, GERP, dbNSFP.FATHMM, LRT, MetaLR, MetaSVM, MutationAssessor, MutationTaster and PROVEAN (vs no benign predictions).
c.290G>C	R97P	16:75513437	missense	P	PS1+PM1+PM2+PP2+PP3		Arg97Pro (chr16:75513437 C⇒G), is classified as 'disease' (Macular Dystrophy, Corneal) by UniProt.				Located in a mutational hot spot and/or critical and well-established functional domain (e.g., active site of an enzyme) without benign variation （sulfotransferase domain)	Allele is not covered in Broad gnomAD genomes.						Missense variant in gene CHST6 which has 65 pathogenic missense variants vs 2 benign missense variants (ratio=32.5 is greater than 3 threshold), associated with the following conditions: Macular dystrophy, corneal, 1 and Macular dystrophy, corneal, 2.	Pathogenic computational verdict because 9 pathogenic predictions from DANN, GERP, dbNSFP.FATHMM, LRT, MetaLR, MetaSVM, MutationAssessor, MutationTaster and PROVEAN (vs no benign predictions).
c.293C>G;c.294C>G	S98W	16:75513433-75513434	missense	LP	PM1+PM2+PP2+PP5						Located in a mutational hot spot and/or critical and well-established functional domain (e.g., active site of an enzyme) without benign variation （sulfotransferase domain)	Allele is not covered in Broad gnomAD genomes.						Missense variant in gene CHST6 which has 65 pathogenic missense variants vs 2 benign missense variants (ratio=32.5 is greater than 3 threshold), associated with the following conditions: Macular dystrophy, corneal, 1 and Macular dystrophy, corneal, 2.			UniProt classifies this variant as 'disease' (Macular Dystrophy, Corneal).
c.293C>T;c.294C>G	S98L	16:75513433-75513434	missense	LP	PM1+PM2+PP2+PP5						Located in a mutational hot spot and/or critical and well-established functional domain (e.g., active site of an enzyme) without benign variation （sulfotransferase domain)	Allele is not covered in Broad gnomAD genomes.						Missense variant in gene CHST6 which has 65 pathogenic missense variants vs 2 benign missense variants (ratio=32.5 is greater than 3 threshold), associated with the following conditions: Macular dystrophy, corneal, 1 and Macular dystrophy, corneal, 2.			UniProt classifies this variant as 'disease' (Macular Dystrophy, Corneal).
c.304T>G	C102G	16:75513423	missense	LP	PM1+PM2+PM5+PP2+PP3+PP5						Located in a mutational hot spot and/or critical and well-established functional domain (e.g., active site of an enzyme) without benign variation （sulfotransferase domain)	Allele is not covered in Broad gnomAD genomes.			Another amino-acid missense variant at this position, Cys102Tyr (chr16:75513422 C⇒T), is classified as 'disease' (Macular Dystrophy, Corneal) by UniProt.			Missense variant in gene CHST6 which has 65 pathogenic missense variants vs 2 benign missense variants (ratio=32.5 is greater than 3 threshold), associated with the following conditions: Macular dystrophy, corneal, 1 and Macular dystrophy, corneal, 2.			UniProt classifies this variant as 'disease' (Macular Dystrophy, Corneal).
c.305G>A	C102Y	16:75513422	missense	P	PS1+PM1+PM2+PP2+PP3+PP5		Cys102Tyr (chr16:75513422 C⇒T), is classified as 'disease' (Macular Dystrophy, Corneal) by UniProt.				Located in a mutational hot spot and/or critical and well-established functional domain (e.g., active site of an enzyme) without benign variation （sulfotransferase domain)	Allele is not covered in Broad gnomAD genomes.						Missense variant in gene CHST6 which has 65 pathogenic missense variants vs 2 benign missense variants (ratio=32.5 is greater than 3 threshold), associated with the following conditions: Macular dystrophy, corneal, 1 and Macular dystrophy, corneal, 2.			UniProt classifies this variant as 'disease' (Macular Dystrophy, Corneal).
c.310A>G	M104V	16:75513417	missense	LP	PM1+PM2+PP2+PP3						Located in a mutational hot spot and/or critical and well-established functional domain (e.g., active site of an enzyme) without benign variation （sulfotransferase domain)	Allele is not covered in Broad gnomAD genomes.						Missense variant in gene CHST6 which has 65 pathogenic missense variants vs 2 benign missense variants (ratio=32.5 is greater than 3 threshold), associated with the following conditions: Macular dystrophy, corneal, 1 and Macular dystrophy, corneal, 2.	Pathogenic computational verdict because 9 pathogenic predictions from DANN, GERP, dbNSFP.FATHMM, LRT, MetaLR, MetaSVM, MutationAssessor, MutationTaster and PROVEAN (vs no benign predictions).
c.320T>C	F107S	16:75513407	missense	LP	PS1+PM1+PM2+PP2+PP3+PP5		The equivalent amino-acid variant Phe107Ser (chr16:75513407 AA⇒CT) is classified as 'disease' (Macular Dystrophy, Corneal) by UniProt.				Located in a mutational hot spot and/or critical and well-established functional domain (e.g., active site of an enzyme) without benign variation （sulfotransferase domain)	Allele is not covered in Broad gnomAD genomes.						Missense variant in gene CHST6 which has 65 pathogenic missense variants vs 2 benign missense variants (ratio=32.5 is greater than 3 threshold), associated with the following conditions: Macular dystrophy, corneal, 1 and Macular dystrophy, corneal, 2.	Pathogenic computational verdict because 9 pathogenic predictions from DANN, GERP, dbNSFP.FATHMM, LRT, MetaLR, MetaSVM, MutationAssessor, MutationTaster and PROVEAN (vs no benign predictions).		UniProt classifies this variant as 'disease' (Macular Dystrophy, Corneal).
c.329A>G	Y110C	16:75513398	missense	LP	PM1+PM2+PP2+PP3+PP5						Located in a mutational hot spot and/or critical and well-established functional domain (e.g., active site of an enzyme) without benign variation （sulfotransferase domain)	Allele is not covered in Broad gnomAD genomes.						Missense variant in gene CHST6 which has 65 pathogenic missense variants vs 2 benign missense variants (ratio=32.5 is greater than 3 threshold), associated with the following conditions: Macular dystrophy, corneal, 1 and Macular dystrophy, corneal, 2.	Pathogenic computational verdict because 9 pathogenic predictions from DANN, GERP, dbNSFP.FATHMM, LRT, MetaLR, MetaSVM, MutationAssessor, MutationTaster and PROVEAN (vs no benign predictions).		UniProt classifies this variant as 'disease' (Macular Dystrophy, Corneal).
c.340C>T	R114C	16:75513387	missense	VUS	PM1+PM2+PP2						Located in a mutational hot spot and/or critical and well-established functional domain (e.g., active site of an enzyme) without benign variation （sulfotransferase domain)	Allele is not covered in Broad gnomAD genomes.						Missense variant in gene CHST6 which has 65 pathogenic missense variants vs 2 benign missense variants (ratio=32.5 is greater than 3 threshold), associated with the following conditions: Macular dystrophy, corneal, 1 and Macular dystrophy, corneal, 2.
c.353C>T	S118F	16:75513374	missense	LP	PM1+PM2+PP2+PP3						Located in a mutational hot spot and/or critical and well-established functional domain (e.g., active site of an enzyme) without benign variation （sulfotransferase domain)	Allele is not covered in Broad gnomAD genomes.						Missense variant in gene CHST6 which has 65 pathogenic missense variants vs 2 benign missense variants (ratio=32.5 is greater than 3 threshold), associated with the following conditions: Macular dystrophy, corneal, 1 and Macular dystrophy, corneal, 2.	Pathogenic computational verdict because 9 pathogenic predictions from DANN, GERP, dbNSFP.FATHMM, LRT, MetaLR, MetaSVM, MutationAssessor, MutationTaster and PROVEAN (vs no benign predictions).
c.362T>C	F121S	16:75513365	missense	LP	PM1+PM2+PM5+PP2+PP3						Located in a mutational hot spot and/or critical and well-established functional domain (e.g., active site of an enzyme) without benign variation （sulfotransferase domain)	Allele is not covered in Broad gnomAD genomes.			Another amino-acid missense variant at this position, Phe121Leu (chr16:75513366 A⇒G), is classified as 'disease' (Macular Dystrophy, Corneal) by UniProt.			Missense variant in gene CHST6 which has 65 pathogenic missense variants vs 2 benign missense variants (ratio=32.5 is greater than 3 threshold), associated with the following conditions: Macular dystrophy, corneal, 1 and Macular dystrophy, corneal, 2.	Pathogenic computational verdict because 9 pathogenic predictions from DANN, GERP, dbNSFP.FATHMM, LRT, MetaLR, MetaSVM, MutationAssessor, MutationTaster and PROVEAN (vs no benign predictions).
c.363C>G	F121L	16:75513364	missense	P	PS1+PM1+PM2+PP2+PP3+PP5		The equivalent amino-acid variant Phe121Leu (chr16:75513364 G⇒T) is classified as 'disease' (Macular Dystrophy, Corneal) by UniProt.				Located in a mutational hot spot and/or critical and well-established functional domain (e.g., active site of an enzyme) without benign variation （sulfotransferase domain)	Allele is not covered in Broad gnomAD genomes.						Missense variant in gene CHST6 which has 65 pathogenic missense variants vs 2 benign missense variants (ratio=32.5 is greater than 3 threshold), associated with the following conditions: Macular dystrophy, corneal, 1 and Macular dystrophy, corneal, 2.	Pathogenic computational verdict because 9 pathogenic predictions from DANN, GERP, dbNSFP.FATHMM, LRT, MetaLR, MetaSVM, MutationAssessor, MutationTaster and PROVEAN (vs no benign predictions).		UniProt classifies this variant as 'disease' (Macular Dystrophy, Corneal).
c.365A>C	Q122P	16:75513362	missense	LP	PM1+PM2+PP2+PP3+PP5						Located in a mutational hot spot and/or critical and well-established functional domain (e.g., active site of an enzyme) without benign variation （sulfotransferase domain)	Allele is not covered in Broad gnomAD genomes.						Missense variant in gene CHST6 which has 65 pathogenic missense variants vs 2 benign missense variants (ratio=32.5 is greater than 3 threshold), associated with the following conditions: Macular dystrophy, corneal, 1 and Macular dystrophy, corneal, 2.	Pathogenic computational verdict because 9 pathogenic predictions from DANN, GERP, dbNSFP.FATHMM, LRT, MetaLR, MetaSVM, MutationAssessor, MutationTaster and PROVEAN (vs no benign predictions).		UniProt classifies this variant as 'disease' (Macular Dystrophy, Corneal).
c.379C>T	R127C	16:75513348	missense	LP	PM1+PM2+PP2+PP3+PP5						Located in a mutational hot spot and/or critical and well-established functional domain (e.g., active site of an enzyme) without benign variation （sulfotransferase domain)	Allele is not covered in Broad gnomAD genomes.						Missense variant in gene CHST6 which has 65 pathogenic missense variants vs 2 benign missense variants (ratio=32.5 is greater than 3 threshold), associated with the following conditions: Macular dystrophy, corneal, 1 and Macular dystrophy, corneal, 2.	Pathogenic computational verdict because 9 pathogenic predictions from DANN, GERP, dbNSFP.FATHMM, LRT, MetaLR, MetaSVM, MutationAssessor, MutationTaster and PROVEAN (vs no benign predictions).		UniProt classifies this variant as 'disease' (Macular Dystrophy, Corneal).
c.382G>A	A128T	16:75513345	missense	LP	PM1+PM2+PM5+PP2+PP3						Located in a mutational hot spot and/or critical and well-established functional domain (e.g., active site of an enzyme) without benign variation （sulfotransferase domain)	Allele is not covered in Broad gnomAD genomes.			Another amino-acid missense variant at this position, Ala128Val (chr16:75513344 G⇒A), is classified as 'disease' (Macular Dystrophy, Corneal) by UniProt.			Missense variant in gene CHST6 which has 65 pathogenic missense variants vs 2 benign missense variants (ratio=32.5 is greater than 3 threshold), associated with the following conditions: Macular dystrophy, corneal, 1 and Macular dystrophy, corneal, 2.	Pathogenic computational verdict because 9 pathogenic predictions from DANN, GERP, dbNSFP.FATHMM, LRT, MetaLR, MetaSVM, MutationAssessor, MutationTaster and PROVEAN (vs no benign predictions).
c.383C>T	A128V	16:75513344	missense	P	PS1+PM1+PM2+PP2+PP3+PP5		Ala128Val (chr16:75513344 G⇒A), is classified as 'disease' (Macular Dystrophy, Corneal) by UniProt.				Located in a mutational hot spot and/or critical and well-established functional domain (e.g., active site of an enzyme) without benign variation （sulfotransferase domain)	Allele is not covered in Broad gnomAD genomes.						Missense variant in gene CHST6 which has 65 pathogenic missense variants vs 2 benign missense variants (ratio=32.5 is greater than 3 threshold), associated with the following conditions: Macular dystrophy, corneal, 1 and Macular dystrophy, corneal, 2.	Pathogenic computational verdict because 9 pathogenic predictions from DANN, GERP, dbNSFP.FATHMM, LRT, MetaLR, MetaSVM, MutationAssessor, MutationTaster and PROVEAN (vs no benign predictions).		UniProt classifies this variant as 'disease' (Macular Dystrophy, Corneal).
c.391T>C	S131P	16:75513336	missense	P	PS1+PM1+PM2+PP2+PP3+PP5		Ser131Pro (chr16:75513336 A⇒G), is classified as 'disease' (Macular Dystrophy, Corneal) by UniProt.				Located in a mutational hot spot and/or critical and well-established functional domain (e.g., active site of an enzyme) without benign variation （sulfotransferase domain)	Allele is not covered in Broad gnomAD genomes.						Missense variant in gene CHST6 which has 65 pathogenic missense variants vs 2 benign missense variants (ratio=32.5 is greater than 3 threshold), associated with the following conditions: Macular dystrophy, corneal, 1 and Macular dystrophy, corneal, 2.	Pathogenic computational verdict because 9 pathogenic predictions from DANN, GERP, dbNSFP.FATHMM, LRT, MetaLR, MetaSVM, MutationAssessor, MutationTaster and PROVEAN (vs no benign predictions).		UniProt classifies this variant as 'disease' (Macular Dystrophy, Corneal).
c.392C>T	S131L	16:75513335	missense	LP	PM1+PM2+PM5+PP2+PP3						Located in a mutational hot spot and/or critical and well-established functional domain (e.g., active site of an enzyme) without benign variation （sulfotransferase domain)	Allele is not covered in Broad gnomAD genomes.			Another amino-acid missense variant at this position, Ser131Pro (chr16:75513336 A⇒G), is classified as 'disease' (Macular Dystrophy, Corneal) by UniProt.			Missense variant in gene CHST6 which has 65 pathogenic missense variants vs 2 benign missense variants (ratio=32.5 is greater than 3 threshold), associated with the following conditions: Macular dystrophy, corneal, 1 and Macular dystrophy, corneal, 2.	Pathogenic computational verdict because 9 pathogenic predictions from DANN, GERP, dbNSFP.FATHMM, LRT, MetaLR, MetaSVM, MutationAssessor, MutationTaster and PROVEAN (vs no benign predictions).
c.395C>T	P132L	16:75513332	missense	LP	PM1+PM2+PP2+PP3						Located in a mutational hot spot and/or critical and well-established functional domain (e.g., active site of an enzyme) without benign variation （sulfotransferase domain)	Allele is not covered in Broad gnomAD genomes.						Missense variant in gene CHST6 which has 65 pathogenic missense variants vs 2 benign missense variants (ratio=32.5 is greater than 3 threshold), associated with the following conditions: Macular dystrophy, corneal, 1 and Macular dystrophy, corneal, 2.	Pathogenic computational verdict because 9 pathogenic predictions from DANN, GERP, dbNSFP.FATHMM, LRT, MetaLR, MetaSVM, MutationAssessor, MutationTaster and PROVEAN (vs no benign predictions).
c.401C>A	A134D	16:75513326	missense	LP	PM1+PM2+PP2+PP3						Located in a mutational hot spot and/or critical and well-established functional domain (e.g., active site of an enzyme) without benign variation （sulfotransferase domain)	Allele is not covered in Broad gnomAD genomes.						Missense variant in gene CHST6 which has 65 pathogenic missense variants vs 2 benign missense variants (ratio=32.5 is greater than 3 threshold), associated with the following conditions: Macular dystrophy, corneal, 1 and Macular dystrophy, corneal, 2.	Pathogenic computational verdict because 9 pathogenic predictions from DANN, GERP, dbNSFP.FATHMM, LRT, MetaLR, MetaSVM, MutationAssessor, MutationTaster and PROVEAN (vs no benign predictions).
c.406A>G	S136G	16:75513321	missense	VUS	PM1+PM2+PP2+BP4						Located in a mutational hot spot and/or critical and well-established functional domain (e.g., active site of an enzyme) without benign variation （sulfotransferase domain)	Allele is not covered in Broad gnomAD genomes.						Missense variant in gene CHST6 which has 65 pathogenic missense variants vs 2 benign missense variants (ratio=32.5 is greater than 3 threshold), associated with the following conditions: Macular dystrophy, corneal, 1 and Macular dystrophy, corneal, 2.
c.430A>C	S144R	16:75513297	missense	LP	PM1+PM2+PP2+PP3						Located in a mutational hot spot and/or critical and well-established functional domain (e.g., active site of an enzyme) without benign variation （sulfotransferase domain)	Allele is not covered in Broad gnomAD genomes.						Missense variant in gene CHST6 which has 65 pathogenic missense variants vs 2 benign missense variants (ratio=32.5 is greater than 3 threshold), associated with the following conditions: Macular dystrophy, corneal, 1 and Macular dystrophy, corneal, 2.	Pathogenic computational verdict because 9 pathogenic predictions from DANN, GERP, dbNSFP.FATHMM, LRT, MetaLR, MetaSVM, MutationAssessor, MutationTaster and PROVEAN (vs no benign predictions).
c.445T>G	C149G	16:75513281	missense	LP	PM1+PM2+PP2+PP3						Located in a mutational hot spot and/or critical and well-established functional domain (e.g., active site of an enzyme) without benign variation （sulfotransferase domain)	Allele is not covered in Broad gnomAD genomes.						Missense variant in gene CHST6 which has 65 pathogenic missense variants vs 2 benign missense variants (ratio=32.5 is greater than 3 threshold), associated with the following conditions: Macular dystrophy, corneal, 1 and Macular dystrophy, corneal, 2.	Pathogenic computational verdict because 9 pathogenic predictions from DANN, GERP, dbNSFP.FATHMM, LRT, MetaLR, MetaSVM, MutationAssessor, MutationTaster and PROVEAN (vs no benign predictions).
c.446G>A	C149Y	16:75513281	missense	LP	PM1+PM2+PP2+PP3						Located in a mutational hot spot and/or critical and well-established functional domain (e.g., active site of an enzyme) without benign variation （sulfotransferase domain)	Allele is not covered in Broad gnomAD genomes.						Missense variant in gene CHST6 which has 65 pathogenic missense variants vs 2 benign missense variants (ratio=32.5 is greater than 3 threshold), associated with the following conditions: Macular dystrophy, corneal, 1 and Macular dystrophy, corneal, 2.	Pathogenic computational verdict because 9 pathogenic predictions from DANN, GERP, dbNSFP.FATHMM, LRT, MetaLR, MetaSVM, MutationAssessor, MutationTaster and PROVEAN (vs no benign predictions).
c.455T>C	L152P	16:75513272	missense	LP	PM1+PM2+PP2+PP3						Located in a mutational hot spot and/or critical and well-established functional domain (e.g., active site of an enzyme) without benign variation （sulfotransferase domain)	Allele is not covered in Broad gnomAD genomes.						Missense variant in gene CHST6 which has 65 pathogenic missense variants vs 2 benign missense variants (ratio=32.5 is greater than 3 threshold), associated with the following conditions: Macular dystrophy, corneal, 1 and Macular dystrophy, corneal, 2.	Pathogenic computational verdict because 9 pathogenic predictions from DANN, GERP, dbNSFP.FATHMM, LRT, MetaLR, MetaSVM, MutationAssessor, MutationTaster and PROVEAN (vs no benign predictions).
c.494G>A	C165Y	16:75513233	missense	LP	PM1+PM2+PP2+PP3						Located in a mutational hot spot and/or critical and well-established functional domain (e.g., active site of an enzyme) without benign variation （sulfotransferase domain)	Allele is not covered in Broad gnomAD genomes.						Missense variant in gene CHST6 which has 65 pathogenic missense variants vs 2 benign missense variants (ratio=32.5 is greater than 3 threshold), associated with the following conditions: Macular dystrophy, corneal, 1 and Macular dystrophy, corneal, 2.	Pathogenic computational verdict because 9 pathogenic predictions from DANN, GERP, dbNSFP.FATHMM, LRT, MetaLR, MetaSVM, MutationAssessor, MutationTaster and PROVEAN (vs no benign predictions).
c.495C>G	C165W	16:75513232	missense	LP	PM1+PM2+PP2+PP3						Located in a mutational hot spot and/or critical and well-established functional domain (e.g., active site of an enzyme) without benign variation （sulfotransferase domain)	Allele is not covered in Broad gnomAD genomes.						Missense variant in gene CHST6 which has 65 pathogenic missense variants vs 2 benign missense variants (ratio=32.5 is greater than 3 threshold), associated with the following conditions: Macular dystrophy, corneal, 1 and Macular dystrophy, corneal, 2.	Pathogenic computational verdict because 9 pathogenic predictions from DANN, GERP, dbNSFP.FATHMM, LRT, MetaLR, MetaSVM, MutationAssessor, MutationTaster and PROVEAN (vs no benign predictions).
c.494G>C;c.495C>T	C165S	16:75513232-75513233	missense	LP	PM1+PM2+PP2+PP3						Located in a mutational hot spot and/or critical and well-established functional domain (e.g., active site of an enzyme) without benign variation （sulfotransferase domain)	Allele is not covered in Broad gnomAD genomes.						Missense variant in gene CHST6 which has 65 pathogenic missense variants vs 2 benign missense variants (ratio=32.5 is greater than 3 threshold), associated with the following conditions: Macular dystrophy, corneal, 1 and Macular dystrophy, corneal, 2.	Pathogenic computational verdict because 9 pathogenic predictions from DANN, GERP, dbNSFP.FATHMM, LRT, MetaLR, MetaSVM, MutationAssessor, MutationTaster and PROVEAN (vs no benign predictions).
c.497G>C	R166P	16:75513230	missense	LP	PM1+PM2+PP2+PP3						Located in a mutational hot spot and/or critical and well-established functional domain (e.g., active site of an enzyme) without benign variation （sulfotransferase domain)	Allele is not covered in Broad gnomAD genomes.						Missense variant in gene CHST6 which has 65 pathogenic missense variants vs 2 benign missense variants (ratio=32.5 is greater than 3 threshold), associated with the following conditions: Macular dystrophy, corneal, 1 and Macular dystrophy, corneal, 2.	Pathogenic computational verdict because 9 pathogenic predictions from DANN, GERP, dbNSFP.FATHMM, LRT, MetaLR, MetaSVM, MutationAssessor, MutationTaster and PROVEAN (vs no benign predictions).
c.500C>T	S167F	16:75513227	missense	LP	PM1+PM2+PP2+PP3						Located in a mutational hot spot and/or critical and well-established functional domain (e.g., active site of an enzyme) without benign variation （sulfotransferase domain)	Allele is not covered in Broad gnomAD genomes.						Missense variant in gene CHST6 which has 65 pathogenic missense variants vs 2 benign missense variants (ratio=32.5 is greater than 3 threshold), associated with the following conditions: Macular dystrophy, corneal, 1 and Macular dystrophy, corneal, 2.	Pathogenic computational verdict because 9 pathogenic predictions from DANN, GERP, dbNSFP.FATHMM, LRT, MetaLR, MetaSVM, MutationAssessor, MutationTaster and PROVEAN (vs no benign predictions).
c.517C>T	L173F	16:75513210	missense	LP	PM1+PM2+PP2+PP3						Located in a mutational hot spot and/or critical and well-established functional domain (e.g., active site of an enzyme) without benign variation （sulfotransferase domain)	Allele is not covered in Broad gnomAD genomes.						Missense variant in gene CHST6 which has 65 pathogenic missense variants vs 2 benign missense variants (ratio=32.5 is greater than 3 threshold), associated with the following conditions: Macular dystrophy, corneal, 1 and Macular dystrophy, corneal, 2.	Pathogenic computational verdict because 9 pathogenic predictions from DANN, GERP, dbNSFP.FATHMM, LRT, MetaLR, MetaSVM, MutationAssessor, MutationTaster and PROVEAN (vs no benign predictions).
c.518T>C	L173P	16:75513209	missense	LP	PM1+PM2+PP2+PP3						Located in a mutational hot spot and/or critical and well-established functional domain (e.g., active site of an enzyme) without benign variation （sulfotransferase domain)	Allele is not covered in Broad gnomAD genomes.						Missense variant in gene CHST6 which has 65 pathogenic missense variants vs 2 benign missense variants (ratio=32.5 is greater than 3 threshold), associated with the following conditions: Macular dystrophy, corneal, 1 and Macular dystrophy, corneal, 2.	Pathogenic computational verdict because 9 pathogenic predictions from DANN, GERP, dbNSFP.FATHMM, LRT, MetaLR, MetaSVM, MutationAssessor, MutationTaster and PROVEAN (vs no benign predictions).
c.521A>G	K174R	16:75513206	missense	LP	PM1+PM2+PP2+PP3						Located in a mutational hot spot and/or critical and well-established functional domain (e.g., active site of an enzyme) without benign variation （sulfotransferase domain)	Allele is not covered in Broad gnomAD genomes.						Missense variant in gene CHST6 which has 65 pathogenic missense variants vs 2 benign missense variants (ratio=32.5 is greater than 3 threshold), associated with the following conditions: Macular dystrophy, corneal, 1 and Macular dystrophy, corneal, 2.	Pathogenic computational verdict because 9 pathogenic predictions from DANN, GERP, dbNSFP.FATHMM, LRT, MetaLR, MetaSVM, MutationAssessor, MutationTaster and PROVEAN (vs no benign predictions).
c.526G>A	V176M	16:75513201	missense	LP	PM1+PM2+PP2+PP3						Located in a mutational hot spot and/or critical and well-established functional domain (e.g., active site of an enzyme) without benign variation （sulfotransferase domain)	Allele is not covered in Broad gnomAD genomes.						Missense variant in gene CHST6 which has 65 pathogenic missense variants vs 2 benign missense variants (ratio=32.5 is greater than 3 threshold), associated with the following conditions: Macular dystrophy, corneal, 1 and Macular dystrophy, corneal, 2.	Pathogenic computational verdict because 8 pathogenic predictions from DANN, GERP, dbNSFP.FATHMM, MetaLR, MetaSVM, MutationAssessor, MutationTaster and PROVEAN (vs 1 benign prediction from LRT).
c.529C>T	R177C	16:75513198	missense	LP	PM1+PM2+PM5+PP2+PP3						Located in a mutational hot spot and/or critical and well-established functional domain (e.g., active site of an enzyme) without benign variation （sulfotransferase domain)	Allele is not covered in Broad gnomAD genomes.			Another amino-acid missense variant at this position, Arg177His (chr16:75513197 C⇒T), is classified as 'disease' (Macular Dystrophy, Corneal) by UniProt.			Missense variant in gene CHST6 which has 65 pathogenic missense variants vs 2 benign missense variants (ratio=32.5 is greater than 3 threshold), associated with the following conditions: Macular dystrophy, corneal, 1 and Macular dystrophy, corneal, 2.	Pathogenic computational verdict because 9 pathogenic predictions from DANN, GERP, dbNSFP.FATHMM, LRT, MetaLR, MetaSVM, MutationAssessor, MutationTaster and PROVEAN (vs no benign predictions).
c.529C>G	R177G	16:75513198	missense	LP	PM1+PM2+PM5+PP2+PP3						Located in a mutational hot spot and/or critical and well-established functional domain (e.g., active site of an enzyme) without benign variation （sulfotransferase domain)	Allele is not covered in Broad gnomAD genomes.			Another amino-acid missense variant at this position, Arg177His (chr16:75513197 C⇒T), is classified as 'disease' (Macular Dystrophy, Corneal) by UniProt.			Missense variant in gene CHST6 which has 65 pathogenic missense variants vs 2 benign missense variants (ratio=32.5 is greater than 3 threshold), associated with the following conditions: Macular dystrophy, corneal, 1 and Macular dystrophy, corneal, 2.	Pathogenic computational verdict because 9 pathogenic predictions from DANN, GERP, dbNSFP.FATHMM, LRT, MetaLR, MetaSVM, MutationAssessor, MutationTaster and PROVEAN (vs no benign predictions).
c.530G>A	R177H	16:75513197	missense	P	PS1+PM1+PM2+PP2+PP3+PP5		Another amino-acid missense variant at this position, Arg177His (chr16:75513197 C⇒T), is classified as 'disease' (Macular Dystrophy, Corneal) by UniProt.				Located in a mutational hot spot and/or critical and well-established functional domain (e.g., active site of an enzyme) without benign variation （sulfotransferase domain)	Allele is not covered in Broad gnomAD genomes.						Missense variant in gene CHST6 which has 65 pathogenic missense variants vs 2 benign missense variants (ratio=32.5 is greater than 3 threshold), associated with the following conditions: Macular dystrophy, corneal, 1 and Macular dystrophy, corneal, 2.	Pathogenic computational verdict because 9 pathogenic predictions from DANN, GERP, dbNSFP.FATHMM, LRT, MetaLR, MetaSVM, MutationAssessor, MutationTaster and PROVEAN (vs no benign predictions).		UniProt classifies this variant as 'disease' (Macular Dystrophy, Corneal).
c.533T>G	F178C	16:75513194	missense	LP	PM1+PM2+PP2+PP3						Located in a mutational hot spot and/or critical and well-established functional domain (e.g., active site of an enzyme) without benign variation （sulfotransferase domain)	Allele is not covered in Broad gnomAD genomes.						Missense variant in gene CHST6 which has 65 pathogenic missense variants vs 2 benign missense variants (ratio=32.5 is greater than 3 threshold), associated with the following conditions: Macular dystrophy, corneal, 1 and Macular dystrophy, corneal, 2.	Pathogenic computational verdict because 8 pathogenic predictions from DANN, GERP, dbNSFP.FATHMM, MetaLR, MetaSVM, MutationAssessor, MutationTaster and PROVEAN (vs 1 benign prediction from LRT).
c.557C>G	P186R	16:75513170	missense	LP	PM1+PM2+PP2+PP3						Located in a mutational hot spot and/or critical and well-established functional domain (e.g., active site of an enzyme) without benign variation （sulfotransferase domain)	Allele is not covered in Broad gnomAD genomes.						Missense variant in gene CHST6 which has 65 pathogenic missense variants vs 2 benign missense variants (ratio=32.5 is greater than 3 threshold), associated with the following conditions: Macular dystrophy, corneal, 1 and Macular dystrophy, corneal, 2.	Pathogenic computational verdict because 8 pathogenic predictions from DANN, GERP, dbNSFP.FATHMM, MetaLR, MetaSVM, MutationAssessor, MutationTaster and PROVEAN (vs 1 benign prediction from LRT).
c.578T>C	L193P	16:75513149	missense	LP	PM1+PM2+PP2+PP3						Located in a mutational hot spot and/or critical and well-established functional domain (e.g., active site of an enzyme) without benign variation （sulfotransferase domain)	Allele is not covered in Broad gnomAD genomes.						Missense variant in gene CHST6 which has 65 pathogenic missense variants vs 2 benign missense variants (ratio=32.5 is greater than 3 threshold), associated with the following conditions: Macular dystrophy, corneal, 1 and Macular dystrophy, corneal, 2.	Pathogenic computational verdict because 8 pathogenic predictions from DANN, GERP, dbNSFP.FATHMM, MetaLR, MetaSVM, MutationAssessor, MutationTaster and PROVEAN (vs 1 benign prediction from LRT).
c.593T>A	V198E	16:75513134	missense	LP	PM1+PM2+PP2+PP3+PP5						Located in a mutational hot spot and/or critical and well-established functional domain (e.g., active site of an enzyme) without benign variation （sulfotransferase domain)	Allele is not covered in Broad gnomAD genomes.						Missense variant in gene CHST6 which has 65 pathogenic missense variants vs 2 benign missense variants (ratio=32.5 is greater than 3 threshold), associated with the following conditions: Macular dystrophy, corneal, 1 and Macular dystrophy, corneal, 2.	Pathogenic computational verdict because 9 pathogenic predictions from DANN, GERP, dbNSFP.FATHMM, LRT, MetaLR, MetaSVM, MutationAssessor, MutationTaster and PROVEAN (vs no benign predictions).		UniProt classifies this variant as 'disease' (Macular Dystrophy, Corneal).
c.599T>G	L200R	16:75513128	missense	LP	PM1+PM2+PP2+PP3+PP5						Located in a mutational hot spot and/or critical and well-established functional domain (e.g., active site of an enzyme) without benign variation （sulfotransferase domain)	Allele is not covered in Broad gnomAD genomes.						Missense variant in gene CHST6 which has 65 pathogenic missense variants vs 2 benign missense variants (ratio=32.5 is greater than 3 threshold), associated with the following conditions: Macular dystrophy, corneal, 1 and Macular dystrophy, corneal, 2.	Pathogenic computational verdict because 9 pathogenic predictions from DANN, GERP, dbNSFP.FATHMM, LRT, MetaLR, MetaSVM, MutationAssessor, MutationTaster and PROVEAN (vs no benign predictions).		UniProt classifies this variant as 'disease' (Macular Dystrophy, Corneal).
c.604C>A	R202S	16:75513123	missense	P	PS1+PM1+PM2+PP2+PP3+PP5		The equivalent amino-acid variant Arg202Ser (chr16:75513122 CG⇒GA) is classified as 'disease' (Macular Dystrophy, Corneal) by UniProt.				UniProt protein CHST6_HUMAN nucleotide phosphate binding region 'PAPS' has 10 pathogenic variants out of 10 classified variants = 100.0% (greater than 70.0%).	Allele is not covered in Broad gnomAD genomes.						Missense variant in gene CHST6 which has 65 pathogenic missense variants vs 2 benign missense variants (ratio=32.5 is greater than 3 threshold), associated with the following conditions: Macular dystrophy, corneal, 1 and Macular dystrophy, corneal, 2.	Pathogenic computational verdict because 9 pathogenic predictions from DANN, GERP, dbNSFP.FATHMM, LRT, MetaLR, MetaSVM, MutationAssessor, MutationTaster and PROVEAN (vs no benign predictions).		UniProt classifies this variant as 'disease' (Macular Dystrophy, Corneal).
c.607G>A	D203N	16:75513120	missense	LP	PM1+PM2+PM5+PP2+PP3						UniProt protein CHST6_HUMAN nucleotide phosphate binding region 'PAPS' has 10 pathogenic variants out of 10 classified variants = 100.0% (greater than 70.0%).	Allele is not covered in Broad gnomAD genomes.			Another amino-acid missense variant at this position, Asp203Glu (chr16:75513118 G⇒C), is classified as 'disease' (Macular Dystrophy, Corneal) by UniProt.			Missense variant in gene CHST6 which has 65 pathogenic missense variants vs 2 benign missense variants (ratio=32.5 is greater than 3 threshold), associated with the following conditions: Macular dystrophy, corneal, 1 and Macular dystrophy, corneal, 2.	Pathogenic computational verdict because 9 pathogenic predictions from DANN, GERP, dbNSFP.FATHMM, LRT, MetaLR, MetaSVM, MutationAssessor, MutationTaster and PROVEAN (vs no benign predictions).
c.607G>T	D203Y	16:75513120	missense	LP	PM1+PM2+PM5+PP2+PP3						UniProt protein CHST6_HUMAN nucleotide phosphate binding region 'PAPS' has 10 pathogenic variants out of 10 classified variants = 100.0% (greater than 70.0%).	Allele is not covered in Broad gnomAD genomes.			Another amino-acid missense variant at this position, Asp203Glu (chr16:75513118 G⇒C), is classified as 'disease' (Macular Dystrophy, Corneal) by UniProt.			Missense variant in gene CHST6 which has 65 pathogenic missense variants vs 2 benign missense variants (ratio=32.5 is greater than 3 threshold), associated with the following conditions: Macular dystrophy, corneal, 1 and Macular dystrophy, corneal, 2.	Pathogenic computational verdict because 9 pathogenic predictions from DANN, GERP, dbNSFP.FATHMM, LRT, MetaLR, MetaSVM, MutationAssessor, MutationTaster and PROVEAN (vs no benign predictions).
c.609C>A	D203E	16:75513118	missense	P	PS1+PM1+PM2+PP2+PP3+PP5		The equivalent amino-acid variant Asp203Glu (chr16:75513118 G⇒C) is classified as 'disease' (Macular Dystrophy, Corneal) by UniProt.				UniProt protein CHST6_HUMAN nucleotide phosphate binding region 'PAPS' has 10 pathogenic variants out of 10 classified variants = 100.0% (greater than 70.0%).	Allele is not covered in Broad gnomAD genomes.						Missense variant in gene CHST6 which has 65 pathogenic missense variants vs 2 benign missense variants (ratio=32.5 is greater than 3 threshold), associated with the following conditions: Macular dystrophy, corneal, 1 and Macular dystrophy, corneal, 2.	Pathogenic computational verdict because 9 pathogenic predictions from DANN, GERP, dbNSFP.FATHMM, LRT, MetaLR, MetaSVM, MutationAssessor, MutationTaster and PROVEAN (vs no benign predictions).		UniProt classifies this variant as 'disease' (Macular Dystrophy, Corneal).
c.610C>T	P204S	16:75513117	missense	LP	PM1+PM2+PM5+PP2+PP3						UniProt protein CHST6_HUMAN nucleotide phosphate binding region 'PAPS' has 10 pathogenic variants out of 10 classified variants = 100.0% (greater than 70.0%).	Allele is not covered in Broad gnomAD genomes.			Another amino-acid missense variant at this position, Pro204Gln (chr16:75513116 G⇒T), is classified as 'disease' (Macular Dystrophy, Corneal) by UniProt.			Missense variant in gene CHST6 which has 65 pathogenic missense variants vs 2 benign missense variants (ratio=32.5 is greater than 3 threshold), associated with the following conditions: Macular dystrophy, corneal, 1 and Macular dystrophy, corneal, 2.	Pathogenic computational verdict because 9 pathogenic predictions from DANN, GERP, dbNSFP.FATHMM, LRT, MetaLR, MetaSVM, MutationAssessor, MutationTaster and PROVEAN (vs no benign predictions).		UniProt classifies this variant as 'disease' (Macular Dystrophy, Corneal).
-	P204G	16:75513116	missense	LP	PM1+PM2+PM5+PP2						UniProt protein CHST6_HUMAN nucleotide phosphate binding region 'PAPS' has 10 pathogenic variants out of 10 classified variants = 100.0% (greater than 70.0%).	Allele is not covered in Broad gnomAD genomes.			Another amino-acid missense variant at this position, Pro204Gln (chr16:75513116 G⇒T), is classified as 'disease' (Macular Dystrophy, Corneal) by UniProt.			Missense variant in gene CHST6 which has 65 pathogenic missense variants vs 2 benign missense variants (ratio=32.5 is greater than 3 threshold), associated with the following conditions: Macular dystrophy, corneal, 1 and Macular dystrophy, corneal, 2.	Pathogenic computational verdict because 9 pathogenic predictions from DANN, GERP, dbNSFP.FATHMM, LRT, MetaLR, MetaSVM, MutationAssessor, MutationTaster and PROVEAN (vs no benign predictions).
c.611C>A	P204Q	16:75513116	missense	P	PS1+PM1+PM2+PP2+PP3		Pro204Gln (chr16:75513116 G⇒T), is classified as 'disease' (Macular Dystrophy, Corneal) by UniProt.				UniProt protein CHST6_HUMAN nucleotide phosphate binding region 'PAPS' has 10 pathogenic variants out of 10 classified variants = 100.0% (greater than 70.0%).	Allele is not covered in Broad gnomAD genomes.						Missense variant in gene CHST6 which has 65 pathogenic missense variants vs 2 benign missense variants (ratio=32.5 is greater than 3 threshold), associated with the following conditions: Macular dystrophy, corneal, 1 and Macular dystrophy, corneal, 2.	Pathogenic computational verdict because 9 pathogenic predictions from DANN, GERP, dbNSFP.FATHMM, LRT, MetaLR, MetaSVM, MutationAssessor, MutationTaster and PROVEAN (vs no benign predictions).		UniProt classifies this variant as 'disease' (Macular Dystrophy, Corneal).
c.611C>G	P204R	16:75513116	missense	LP	PM1+PM2+PM5+PP2+PP3						UniProt protein CHST6_HUMAN nucleotide phosphate binding region 'PAPS' has 10 pathogenic variants out of 10 classified variants = 100.0% (greater than 70.0%).	Allele is not covered in Broad gnomAD genomes.			Another amino-acid missense variant at this position, Pro204Gln (chr16:75513116 G⇒T), is classified as 'disease' (Macular Dystrophy, Corneal) by UniProt.			Missense variant in gene CHST6 which has 65 pathogenic missense variants vs 2 benign missense variants (ratio=32.5 is greater than 3 threshold), associated with the following conditions: Macular dystrophy, corneal, 1 and Macular dystrophy, corneal, 2.	Pathogenic computational verdict because 9 pathogenic predictions from DANN, GERP, dbNSFP.FATHMM, LRT, MetaLR, MetaSVM, MutationAssessor, MutationTaster and PROVEAN (vs no benign predictions).		UniProt classifies this variant as 'disease' (Macular Dystrophy, Corneal).
c.613C>T	R205W	16:75513114	missense	LP	PM1+PM2+PM5+PP2+PP3						UniProt protein CHST6_HUMAN nucleotide phosphate binding region 'PAPS' has 10 pathogenic variants out of 10 classified variants = 100.0% (greater than 70.0%).	Allele is not covered in Broad gnomAD genomes.			Another amino-acid missense variant at this position, Arg205Gln (chr16:75513113 C⇒T), is classified as 'disease' (Macular Dystrophy, Corneal) by UniProt.			Missense variant in gene CHST6 which has 65 pathogenic missense variants vs 2 benign missense variants (ratio=32.5 is greater than 3 threshold), associated with the following conditions: Macular dystrophy, corneal, 1 and Macular dystrophy, corneal, 2.	Pathogenic computational verdict because 9 pathogenic predictions from DANN, GERP, dbNSFP.FATHMM, LRT, MetaLR, MetaSVM, MutationAssessor, MutationTaster and PROVEAN (vs no benign predictions).		UniProt classifies this variant as 'disease' (Macular Dystrophy, Corneal).
c.614G>A	R205Q	16:75513113	missense	P	PS1+PM1+PM2+PP2+PP3+PP5		Arg205Gln (chr16:75513113 C⇒T), is classified as 'disease' (Macular Dystrophy, Corneal) by UniProt.				UniProt protein CHST6_HUMAN nucleotide phosphate binding region 'PAPS' has 10 pathogenic variants out of 10 classified variants = 100.0% (greater than 70.0%).	Allele is not covered in Broad gnomAD genomes.						Missense variant in gene CHST6 which has 65 pathogenic missense variants vs 2 benign missense variants (ratio=32.5 is greater than 3 threshold), associated with the following conditions: Macular dystrophy, corneal, 1 and Macular dystrophy, corneal, 2.	Pathogenic computational verdict because 9 pathogenic predictions from DANN, GERP, dbNSFP.FATHMM, LRT, MetaLR, MetaSVM, MutationAssessor, MutationTaster and PROVEAN (vs no benign predictions).		UniProt classifies this variant as 'disease' (Macular Dystrophy, Corneal).
c.614G>T	R205L	16:75513113	missense	LP	PM1+PM2+PM5+PP2+PP3+PP5						UniProt protein CHST6_HUMAN nucleotide phosphate binding region 'PAPS' has 10 pathogenic variants out of 10 classified variants = 100.0% (greater than 70.0%).	Allele is not covered in Broad gnomAD genomes.			Another amino-acid missense variant at this position, Arg205Gln (chr16:75513113 C⇒T), is classified as 'disease' (Macular Dystrophy, Corneal) by UniProt.			Missense variant in gene CHST6 which has 65 pathogenic missense variants vs 2 benign missense variants (ratio=32.5 is greater than 3 threshold), associated with the following conditions: Macular dystrophy, corneal, 1 and Macular dystrophy, corneal, 2.	Pathogenic computational verdict because 9 pathogenic predictions from DANN, GERP, dbNSFP.FATHMM, LRT, MetaLR, MetaSVM, MutationAssessor, MutationTaster and PROVEAN (vs no benign predictions).		UniProt classifies this variant as 'disease' (Macular Dystrophy, Corneal).
c.616G>A	A206T	16:75513111	missense	LP	PM1+PM2+PM5+PP2+PP3+PP5						UniProt protein CHST6_HUMAN nucleotide phosphate binding region 'PAPS' has 10 pathogenic variants out of 10 classified variants = 100.0% (greater than 70.0%).	Allele is not covered in Broad gnomAD genomes.			Another amino-acid missense variant at this position, Arg205Gln (chr16:75513113 C⇒T), is classified as 'disease' (Macular Dystrophy, Corneal) by UniProt.			Missense variant in gene CHST6 which has 65 pathogenic missense variants vs 2 benign missense variants (ratio=32.5 is greater than 3 threshold), associated with the following conditions: Macular dystrophy, corneal, 1 and Macular dystrophy, corneal, 2.	Pathogenic computational verdict because 9 pathogenic predictions from DANN, GERP, dbNSFP.FATHMM, LRT, MetaLR, MetaSVM, MutationAssessor, MutationTaster and PROVEAN (vs no benign predictions).		UniProt classifies this variant as 'disease' (Macular Dystrophy, Corneal).
c.617C>T	A206V	16:75513110	missense	LP	PM1+PM2+PM5+PP2+PP3+PP5						UniProt protein CHST6_HUMAN nucleotide phosphate binding region 'PAPS' has 10 pathogenic variants out of 10 classified variants = 100.0% (greater than 70.0%).	Allele is not covered in Broad gnomAD genomes.			Another amino-acid missense variant at this position, Arg205Gln (chr16:75513113 C⇒T), is classified as 'disease' (Macular Dystrophy, Corneal) by UniProt.			Missense variant in gene CHST6 which has 65 pathogenic missense variants vs 2 benign missense variants (ratio=32.5 is greater than 3 threshold), associated with the following conditions: Macular dystrophy, corneal, 1 and Macular dystrophy, corneal, 2.	Pathogenic computational verdict because 9 pathogenic predictions from DANN, GERP, dbNSFP.FATHMM, LRT, MetaLR, MetaSVM, MutationAssessor, MutationTaster and PROVEAN (vs no benign predictions).		UniProt classifies this variant as 'disease' (Macular Dystrophy, Corneal).
c.629C>T	S210F	16:75513098	missense	LP	PM1+PM2+PP2+PP3+PP5						UniProt protein CHST6_HUMAN nucleotide phosphate binding region 'PAPS' has 10 pathogenic variants out of 10 classified variants = 100.0% (greater than 70.0%).	Allele is not covered in Broad gnomAD genomes.						Missense variant in gene CHST6 which has 65 pathogenic missense variants vs 2 benign missense variants (ratio=32.5 is greater than 3 threshold), associated with the following conditions: Macular dystrophy, corneal, 1 and Macular dystrophy, corneal, 2.	Pathogenic computational verdict because 9 pathogenic predictions from DANN, GERP, dbNSFP.FATHMM, LRT, MetaLR, MetaSVM, MutationAssessor, MutationTaster and PROVEAN (vs no benign predictions).		UniProt classifies this variant as 'disease' (Macular Dystrophy, Corneal).
c.631C>G	R211G	16:75513096	missense	LP	PM1+PM2+PM5+PP2+PP3						UniProt protein CHST6_HUMAN nucleotide phosphate binding region 'PAPS' has 10 pathogenic variants out of 10 classified variants = 100.0% (greater than 70.0%).	Allele is not covered in Broad gnomAD genomes.			Another amino-acid missense variant at this position, Arg211Trp (chr16:75513096 G⇒A), is classified as 'disease' (Macular Dystrophy, Corneal) by UniProt.			Missense variant in gene CHST6 which has 65 pathogenic missense variants vs 2 benign missense variants (ratio=32.5 is greater than 3 threshold), associated with the following conditions: Macular dystrophy, corneal, 1 and Macular dystrophy, corneal, 2.	Pathogenic computational verdict because 9 pathogenic predictions from DANN, GERP, dbNSFP.FATHMM, LRT, MetaLR, MetaSVM, MutationAssessor, MutationTaster and PROVEAN (vs no benign predictions).
c.631C>T	R211W	16:75513096	missense	P	PS1+PM1+PM2+PM5+PP2+PP3+PP5		Arg211Trp (chr16:75513096 G⇒A), is classified as 'disease' (Macular Dystrophy, Corneal) by UniProt.				UniProt protein CHST6_HUMAN nucleotide phosphate binding region 'PAPS' has 10 pathogenic variants out of 10 classified variants = 100.0% (greater than 70.0%).	Allele is not covered in Broad gnomAD genomes.						Missense variant in gene CHST6 which has 65 pathogenic missense variants vs 2 benign missense variants (ratio=32.5 is greater than 3 threshold), associated with the following conditions: Macular dystrophy, corneal, 1 and Macular dystrophy, corneal, 2.	Pathogenic computational verdict because 9 pathogenic predictions from DANN, GERP, dbNSFP.FATHMM, LRT, MetaLR, MetaSVM, MutationAssessor, MutationTaster and PROVEAN (vs no benign predictions).		UniProt classifies this variant as 'disease' (Macular Dystrophy, Corneal).
c.632G>A	R211Q	16:75513095	missense	LP	PM1+PM2+PM5+PP2+PP3+PP5						UniProt protein CHST6_HUMAN nucleotide phosphate binding region 'PAPS' has 10 pathogenic variants out of 10 classified variants = 100.0% (greater than 70.0%).	Allele is not covered in Broad gnomAD genomes.			Another amino-acid missense variant at this position, Arg211Trp (chr16:75513096 G⇒A), is classified as 'disease' (Macular Dystrophy, Corneal) by UniProt.			Missense variant in gene CHST6 which has 65 pathogenic missense variants vs 2 benign missense variants (ratio=32.5 is greater than 3 threshold), associated with the following conditions: Macular dystrophy, corneal, 1 and Macular dystrophy, corneal, 2.	Pathogenic computational verdict because 9 pathogenic predictions from DANN, GERP, dbNSFP.FATHMM, LRT, MetaLR, MetaSVM, MutationAssessor, MutationTaster and PROVEAN (vs no benign predictions).		UniProt classifies this variant as 'disease' (Macular Dystrophy, Corneal).
c.649G>A	A217T	16:75513078	missense	LP	PM1+PM2+PP2+PP3+PP5						Located in a mutational hot spot and/or critical and well-established functional domain (e.g., active site of an enzyme) without benign variation （sulfotransferase domain)	Allele is not covered in Broad gnomAD genomes.						Missense variant in gene CHST6 which has 65 pathogenic missense variants vs 2 benign missense variants (ratio=32.5 is greater than 3 threshold), associated with the following conditions: Macular dystrophy, corneal, 1 and Macular dystrophy, corneal, 2.	Pathogenic computational verdict because 9 pathogenic predictions from DANN, GERP, dbNSFP.FATHMM, LRT, MetaLR, MetaSVM, MutationAssessor, MutationTaster and PROVEAN (vs no benign predictions).		UniProt classifies this variant as 'disease' (Macular Dystrophy, Corneal).
c.661G>T	D221Y	16:75513066	missense	LP	PM1+PM2+PM5+PP2+PP3+PP5						Located in a mutational hot spot and/or critical and well-established functional domain (e.g., active site of an enzyme) without benign variation （sulfotransferase domain)	Allele is not covered in Broad gnomAD genomes.			Another amino-acid missense variant at this position, Asp221Glu (chr16:75513064 G⇒T), is classified as 'disease' (Macular Dystrophy, Corneal) by UniProt.			Missense variant in gene CHST6 which has 65 pathogenic missense variants vs 2 benign missense variants (ratio=32.5 is greater than 3 threshold), associated with the following conditions: Macular dystrophy, corneal, 1 and Macular dystrophy, corneal, 2.	Pathogenic computational verdict because 9 pathogenic predictions from DANN, GERP, dbNSFP.FATHMM, LRT, MetaLR, MetaSVM, MutationAssessor, MutationTaster and PROVEAN (vs no benign predictions).		UniProt classifies this variant as 'disease' (Macular Dystrophy, Corneal).
c.663C>G	D221E	16:75513064	missense	P	PS1+PM1+PM2+PM5+PP2+PP3+PP5		The equivalent amino-acid variant Asp221Glu (chr16:75513064 G⇒C) is classified as 'disease' (Macular Dystrophy, Corneal) by UniProt.				Located in a mutational hot spot and/or critical and well-established functional domain (e.g., active site of an enzyme) without benign variation （sulfotransferase domain)	Allele is not covered in Broad gnomAD genomes.			Another amino-acid missense variant at this position, Asp221Tyr (chr16:75513066 C⇒A), is classified as 'disease' (Macular Dystrophy, Corneal) by UniProt.			Missense variant in gene CHST6 which has 65 pathogenic missense variants vs 2 benign missense variants (ratio=32.5 is greater than 3 threshold), associated with the following conditions: Macular dystrophy, corneal, 1 and Macular dystrophy, corneal, 2.	Pathogenic computational verdict because 9 pathogenic predictions from DANN, GERP, dbNSFP.FATHMM, LRT, MetaLR, MetaSVM, MutationAssessor, MutationTaster and PROVEAN (vs no benign predictions).		UniProt classifies this variant as 'disease' (Macular Dystrophy, Corneal).
c.668G>A	G223D	16:75513059	missense	LP	PM1+PM2+PP2+PP3						Located in a mutational hot spot and/or critical and well-established functional domain (e.g., active site of an enzyme) without benign variation （sulfotransferase domain)	Allele is not covered in Broad gnomAD genomes.						Missense variant in gene CHST6 which has 65 pathogenic missense variants vs 2 benign missense variants (ratio=32.5 is greater than 3 threshold), associated with the following conditions: Macular dystrophy, corneal, 1 and Macular dystrophy, corneal, 2.	Pathogenic computational verdict because 8 pathogenic predictions from DANN, GERP, dbNSFP.FATHMM, LRT, MetaLR, MetaSVM, MutationAssessor and MutationTaster (vs 1 benign prediction from PROVEAN).
c.682A>G; 683C>A	T228D	16:75513044-75513045	missense	VUS	PM1+PM2+PP2						Located in a mutational hot spot and/or critical and well-established functional domain (e.g., active site of an enzyme) without benign variation （sulfotransferase domain)	Allele is not covered in Broad gnomAD genomes.						Missense variant in gene CHST6 which has 65 pathogenic missense variants vs 2 benign missense variants (ratio=32.5 is greater than 3 threshold), associated with the following conditions: Macular dystrophy, corneal, 1 and Macular dystrophy, corneal, 2.
c.738C>G	C246W	16:75512989	missense	LP	PM1+PM2+PP2+PP3						Located in a mutational hot spot and/or critical and well-established functional domain (e.g., active site of an enzyme) without benign variation （sulfotransferase domain)	Allele is not covered in Broad gnomAD genomes.						Missense variant in gene CHST6 which has 65 pathogenic missense variants vs 2 benign missense variants (ratio=32.5 is greater than 3 threshold), associated with the following conditions: Macular dystrophy, corneal, 1 and Macular dystrophy, corneal, 2.	Pathogenic computational verdict because 8 pathogenic predictions from DANN, GERP, dbNSFP.FATHMM, LRT, MetaLR, MetaSVM, MutationAssessor and MutationTaster (vs 1 benign prediction from PROVEAN).
c.744C>G	S248R	16:75512983	missense	LP	PM1+PM2+PP2+PP3						Located in a mutational hot spot and/or critical and well-established functional domain (e.g., active site of an enzyme) without benign variation （sulfotransferase domain)	Allele is not covered in Broad gnomAD genomes.						Missense variant in gene CHST6 which has 65 pathogenic missense variants vs 2 benign missense variants (ratio=32.5 is greater than 3 threshold), associated with the following conditions: Macular dystrophy, corneal, 1 and Macular dystrophy, corneal, 2.	Pathogenic computational verdict because 8 pathogenic predictions from DANN, GERP, dbNSFP.FATHMM, LRT, MetaLR, MetaSVM, MutationAssessor and MutationTaster (vs 1 benign prediction from PROVEAN).
c.746A>C	H249P	16:75512981	missense	P	PS1+PM1+PM2+PP2+PP3+PP5		His249Pro (chr16:75512981 T⇒G), is classified as 'disease' (Macular Dystrophy, Corneal) by UniProt.				Located in a mutational hot spot and/or critical and well-established functional domain (e.g., active site of an enzyme) without benign variation （sulfotransferase domain)	Allele is not covered in Broad gnomAD genomes.						Missense variant in gene CHST6 which has 65 pathogenic missense variants vs 2 benign missense variants (ratio=32.5 is greater than 3 threshold), associated with the following conditions: Macular dystrophy, corneal, 1 and Macular dystrophy, corneal, 2.	Pathogenic computational verdict because 9 pathogenic predictions from DANN, GERP, dbNSFP.FATHMM, LRT, MetaLR, MetaSVM, MutationAssessor, MutationTaster and PROVEAN (vs no benign predictions).		UniProt classifies this variant as 'disease' (Macular Dystrophy, Corneal).
c.746A>G	H249R	16:75512981	missense	LP	PM1+PM2+PM5+PP2+PP3						Located in a mutational hot spot and/or critical and well-established functional domain (e.g., active site of an enzyme) without benign variation （sulfotransferase domain)	Allele is not covered in Broad gnomAD genomes.			Another amino-acid missense variant at this position, His249Pro (chr16:75512981 T⇒G), is classified as 'disease' (Macular Dystrophy, Corneal) by UniProt.			Missense variant in gene CHST6 which has 65 pathogenic missense variants vs 2 benign missense variants (ratio=32.5 is greater than 3 threshold), associated with the following conditions: Macular dystrophy, corneal, 1 and Macular dystrophy, corneal, 2.	Pathogenic computational verdict because 9 pathogenic predictions from DANN, GERP, dbNSFP.FATHMM, LRT, MetaLR, MetaSVM, MutationAssessor, MutationTaster and PROVEAN (vs no benign predictions).
c.803A>G	Y268C	16:75512924	missense	LP	PM1+PM2+PP2+PP3						Located in a mutational hot spot and/or critical and well-established functional domain (e.g., active site of an enzyme) without benign variation （sulfotransferase domain)	Allele is not covered in Broad gnomAD genomes.						Missense variant in gene CHST6 which has 65 pathogenic missense variants vs 2 benign missense variants (ratio=32.5 is greater than 3 threshold), associated with the following conditions: Macular dystrophy, corneal, 1 and Macular dystrophy, corneal, 2.	Pathogenic computational verdict because 8 pathogenic predictions from DANN, GERP, dbNSFP.FATHMM, LRT, MetaLR, MetaSVM, MutationAssessor and MutationTaster (vs 1 benign prediction from PROVEAN).
c.814C>A	R272S	16:75512913	missense	LP	PM1+PM2+PP2+PP3						Located in a mutational hot spot and/or critical and well-established functional domain (e.g., active site of an enzyme) without benign variation （sulfotransferase domain)	Allele is not covered in Broad gnomAD genomes.						Missense variant in gene CHST6 which has 65 pathogenic missense variants vs 2 benign missense variants (ratio=32.5 is greater than 3 threshold), associated with the following conditions: Macular dystrophy, corneal, 1 and Macular dystrophy, corneal, 2.	Pathogenic computational verdict because 8 pathogenic predictions from DANN, GERP, dbNSFP.FATHMM, LRT, MetaLR, MetaSVM, MutationAssessor and MutationTaster (vs 1 benign prediction from PROVEAN).
c.815G>A	R272H	16:75512912	missense	LP	PM1+PM2+PP2+PP3						Located in a mutational hot spot and/or critical and well-established functional domain (e.g., active site of an enzyme) without benign variation （sulfotransferase domain)	Allele is not covered in Broad gnomAD genomes.						Missense variant in gene CHST6 which has 65 pathogenic missense variants vs 2 benign missense variants (ratio=32.5 is greater than 3 threshold), associated with the following conditions: Macular dystrophy, corneal, 1 and Macular dystrophy, corneal, 2.	Pathogenic computational verdict because 8 pathogenic predictions from DANN, GERP, dbNSFP.FATHMM, LRT, MetaLR, MetaSVM, MutationAssessor and MutationTaster (vs 1 benign prediction from PROVEAN).
c.820G>A	E274K	16:75512907	missense	P	PS1+PM1+PM2+PP2+PP3		Glu274Lys (chr16:75512907 C⇒T), is classified as 'disease' (Macular Dystrophy, Corneal) by UniProt.				Located in a mutational hot spot and/or critical and well-established functional domain (e.g., active site of an enzyme) without benign variation （sulfotransferase domain)	Allele is not covered in Broad gnomAD genomes.						Missense variant in gene CHST6 which has 65 pathogenic missense variants vs 2 benign missense variants (ratio=32.5 is greater than 3 threshold), associated with the following conditions: Macular dystrophy, corneal, 1 and Macular dystrophy, corneal, 2.	Pathogenic computational verdict because 9 pathogenic predictions from DANN, GERP, dbNSFP.FATHMM, LRT, MetaLR, MetaSVM, MutationAssessor, MutationTaster and PROVEAN (vs no benign predictions).
c.820G>C	E274Q	16:75512907	missense	LP	PM1+PM2+PM5+PP2+PP3						Located in a mutational hot spot and/or critical and well-established functional domain (e.g., active site of an enzyme) without benign variation （sulfotransferase domain)	Allele is not covered in Broad gnomAD genomes.			Another amino-acid missense variant at this position, Glu274Lys (chr16:75512907 C⇒T), is classified as 'disease' (Macular Dystrophy, Corneal) by UniProt.			Missense variant in gene CHST6 which has 65 pathogenic missense variants vs 2 benign missense variants (ratio=32.5 is greater than 3 threshold), associated with the following conditions: Macular dystrophy, corneal, 1 and Macular dystrophy, corneal, 2.	Pathogenic computational verdict because 9 pathogenic predictions from DANN, GERP, dbNSFP.FATHMM, LRT, MetaLR, MetaSVM, MutationAssessor, MutationTaster and PROVEAN (vs no benign predictions).
c.827T>C	L276P	16:75512900	missense	LP	PM1+PM2+PP2+PP3+PP5						Located in a mutational hot spot and/or critical and well-established functional domain (e.g., active site of an enzyme) without benign variation （sulfotransferase domain)	Allele is not covered in Broad gnomAD genomes.						Missense variant in gene CHST6 which has 65 pathogenic missense variants vs 2 benign missense variants (ratio=32.5 is greater than 3 threshold), associated with the following conditions: Macular dystrophy, corneal, 1 and Macular dystrophy, corneal, 2.	Pathogenic computational verdict because 8 pathogenic predictions from DANN, GERP, dbNSFP.FATHMM, LRT, MetaLR, MetaSVM, MutationAssessor and MutationTaster (vs 1 benign prediction from PROVEAN).		UniProt classifies this variant as 'disease' (Macular Dystrophy, Corneal).
c.877C>T	L293F	16:75512850	missense	LP	PM1+PM2+PP2+PP3						Located in a mutational hot spot and/or critical and well-established functional domain (e.g., active site of an enzyme) without benign variation （sulfotransferase domain)	Allele is not covered in Broad gnomAD genomes.						Missense variant in gene CHST6 which has 65 pathogenic missense variants vs 2 benign missense variants (ratio=32.5 is greater than 3 threshold), associated with the following conditions: Macular dystrophy, corneal, 1 and Macular dystrophy, corneal, 2.	Pathogenic computational verdict because 8 pathogenic predictions from DANN, GERP, dbNSFP.FATHMM, LRT, MetaLR, MetaSVM, MutationAssessor and MutationTaster (vs 1 benign prediction from PROVEAN).
c.922C>T	H308Y	16:75512805	missense	LP	PM1+PM2+PP2+PP3						Located in a mutational hot spot and/or critical and well-established functional domain (e.g., active site of an enzyme) without benign variation （sulfotransferase domain)	Allele is not covered in Broad gnomAD genomes.						Missense variant in gene CHST6 which has 65 pathogenic missense variants vs 2 benign missense variants (ratio=32.5 is greater than 3 threshold), associated with the following conditions: Macular dystrophy, corneal, 1 and Macular dystrophy, corneal, 2.	Pathogenic computational verdict because 9 pathogenic predictions from DANN, GERP, dbNSFP.FATHMM, LRT, MetaLR, MetaSVM, MutationAssessor, MutationTaster and PROVEAN (vs no benign predictions).
c.985G>C	V329L	16:75512742	missense	LP	PM1+PM2+PP2+PP3						Located in a mutational hot spot and/or critical and well-established functional domain (e.g., active site of an enzyme) without benign variation （sulfotransferase domain)	Allele is not covered in Broad gnomAD genomes.						Missense variant in gene CHST6 which has 65 pathogenic missense variants vs 2 benign missense variants (ratio=32.5 is greater than 3 threshold), associated with the following conditions: Macular dystrophy, corneal, 1 and Macular dystrophy, corneal, 2.	Pathogenic computational verdict because 8 pathogenic predictions from DANN, GERP, dbNSFP.FATHMM, LRT, MetaLR, MetaSVM, MutationAssessor and MutationTaster (vs 1 benign prediction from PROVEAN).
c.993G>T	Q331H	16:75512734	missense	LP	PM1+PM2+PP2+PP3						Located in a mutational hot spot and/or critical and well-established functional domain (e.g., active site of an enzyme) without benign variation （sulfotransferase domain)	Allele is not covered in Broad gnomAD genomes.						Missense variant in gene CHST6 which has 65 pathogenic missense variants vs 2 benign missense variants (ratio=32.5 is greater than 3 threshold), associated with the following conditions: Macular dystrophy, corneal, 1 and Macular dystrophy, corneal, 2.	Pathogenic computational verdict because 8 pathogenic predictions from DANN, GERP, dbNSFP.FATHMM, LRT, MetaLR, MetaSVM, MutationAssessor and MutationTaster (vs 1 benign prediction from PROVEAN).
c.997T>G	W333G	16:75512730	missense	LP	PM1+PM2+PP2+PP3						Located in a mutational hot spot and/or critical and well-established functional domain (e.g., active site of an enzyme) without benign variation （sulfotransferase domain)	Allele is not covered in Broad gnomAD genomes.						Missense variant in gene CHST6 which has 65 pathogenic missense variants vs 2 benign missense variants (ratio=32.5 is greater than 3 threshold), associated with the following conditions: Macular dystrophy, corneal, 1 and Macular dystrophy, corneal, 2.	Pathogenic computational verdict because 8 pathogenic predictions from DANN, GERP, dbNSFP.FATHMM, LRT, MetaLR, MetaSVM, MutationAssessor and MutationTaster (vs 1 benign prediction from PROVEAN).
c.1000C>T	R334C	16:75512727	missense	LP	PM1+PM2+PP2+PP3						Located in a mutational hot spot and/or critical and well-established functional domain (e.g., active site of an enzyme) without benign variation （sulfotransferase domain)	Allele is not covered in Broad gnomAD genomes.						Missense variant in gene CHST6 which has 65 pathogenic missense variants vs 2 benign missense variants (ratio=32.5 is greater than 3 threshold), associated with the following conditions: Macular dystrophy, corneal, 1 and Macular dystrophy, corneal, 2.	Pathogenic computational verdict because 8 pathogenic predictions from DANN, GERP, dbNSFP.FATHMM, LRT, MetaLR, MetaSVM, MutationAssessor and MutationTaster (vs 1 benign prediction from PROVEAN).
c.1045T>A	C349S	16:75512682	missense	LP	PM1+PM2+PP2+PP3						Located in a mutational hot spot and/or critical and well-established functional domain (e.g., active site of an enzyme) without benign variation （sulfotransferase domain)	Allele is not covered in Broad gnomAD genomes.						Missense variant in gene CHST6 which has 65 pathogenic missense variants vs 2 benign missense variants (ratio=32.5 is greater than 3 threshold), associated with the following conditions: Macular dystrophy, corneal, 1 and Macular dystrophy, corneal, 2.	Pathogenic computational verdict because 8 pathogenic predictions from DANN, GERP, dbNSFP.FATHMM, LRT, MetaLR, MetaSVM, MutationAssessor and MutationTaster (vs 1 benign prediction from PROVEAN).
c.1046G>A	C349Y	16:75512681	missense	LP	PM1+PM2+PP2+PP3						Located in a mutational hot spot and/or critical and well-established functional domain (e.g., active site of an enzyme) without benign variation （sulfotransferase domain)	Allele is not covered in Broad gnomAD genomes.						Missense variant in gene CHST6 which has 65 pathogenic missense variants vs 2 benign missense variants (ratio=32.5 is greater than 3 threshold), associated with the following conditions: Macular dystrophy, corneal, 1 and Macular dystrophy, corneal, 2.	Pathogenic computational verdict because 8 pathogenic predictions from DANN, GERP, dbNSFP.FATHMM, LRT, MetaLR, MetaSVM, MutationAssessor and MutationTaster (vs 1 benign prediction from PROVEAN).
c.1072T>C	Y358H	16:75512655	missense	LP	PM1+PM2+PM5+PP2+PP3						Located in a mutational hot spot and/or critical and well-established functional domain (e.g., active site of an enzyme) without benign variation （sulfotransferase domain)	Allele is not covered in Broad gnomAD genomes.			Another amino-acid missense variant at this position, Tyr358Asp (chr16:75512655 A⇒C), is classified as 'disease' (Macular Dystrophy, Corneal) by UniProt.			Missense variant in gene CHST6 which has 65 pathogenic missense variants vs 2 benign missense variants (ratio=32.5 is greater than 3 threshold), associated with the following conditions: Macular dystrophy, corneal, 1 and Macular dystrophy, corneal, 2.	Pathogenic computational verdict because 8 pathogenic predictions from DANN, GERP, dbNSFP.FATHMM, LRT, MetaLR, MetaSVM, MutationAssessor and MutationTaster (vs 1 benign prediction from PROVEAN).
c.1072T>G	Y358D	16:75512655	missense	P	PS1+PM1+PM2+PP2+PP3+PP5		Tyr358Asp (chr16:75512655 A⇒C), is classified as 'disease' (Macular Dystrophy, Corneal) by UniProt.				Located in a mutational hot spot and/or critical and well-established functional domain (e.g., active site of an enzyme) without benign variation （sulfotransferase domain)	Allele is not covered in Broad gnomAD genomes.						Missense variant in gene CHST6 which has 65 pathogenic missense variants vs 2 benign missense variants (ratio=32.5 is greater than 3 threshold), associated with the following conditions: Macular dystrophy, corneal, 1 and Macular dystrophy, corneal, 2.	Pathogenic computational verdict because 8 pathogenic predictions from DANN, GERP, dbNSFP.FATHMM, LRT, MetaLR, MetaSVM, MutationAssessor and MutationTaster (vs 1 benign prediction from PROVEAN).		UniProt classifies this variant as 'disease' (Macular Dystrophy, Corneal).
