# Supplementary material for: A comprehensive evaluation of 181 reported CHST6 variants in patients with macular corneal dystrophy
Source: Aging (Albany NY). 2019 Feb 4;11(3):1019–29. doi: 10.18632/aging.101807 (PMC6382428; doi:10.18632/aging.101807)
Supplement: Supplementary Table 3 [file aging-11-101807-s003.xlsx]

## Sheet: 工作表1
Table S3. ACMG classification for protein-truncating variants in CHST6 gene
Nucleotide change (NM_021615.4)	Amino acid change	Genomic coordinates (GRCh37/hg19）	Nature of effect	ACMG		PVS1	PS1	PS2	PS3	PS4	PM1	PM2	PM3	PM4	PM5	PM6	PP1	PP2	PP3	PP4	PP5	BA1	BS1	BS2	BS3	BS4	BP1	BP2	BP3	BP4	BP5	BP6	BP7
-	V6fs	16:75513712	frameshift	p
c.51delG	Q18fs	16:75513676	frameshift	p
c.61-62insA, 62T>G	F20fs	16:75513666	frameshift	p
c.97-100delTCCC	P31fs	16:75513627-75513630	frameshift	p
-	S32fs	16:75513632	frameshift	p
c.180delC	F60fs	16:75513547	frameshift	p
C.198delC	V66fs	16:75513529	frameshift	p
-	F67Sfs	16:75513526	frameshift	p
c.271_273delGCTinsA	A91fs	16:75513454-75513456	frameshift	p
c.290-291 ins G	S98L fs	16:75513436-75513437	frameshift	p
c.363_364insC	F121fs	16:75513363-75513364	frameshift	p
c.375_376ins(GGCCGTG)	V125fs	16:75513351-75513352	frameshift	p
c.414insTT	A137fs	16:75513313	frameshift	p
-	C149fs	16:75513280	frameshift	p
c.463-464 del CG	R155Afs	16:75513262	frameshift	p
c.545delA	Q182fs	16:75513182	frameshift	p
c.573_574insC	A192fs	16:75513153	frameshift	p
c.606_607delGC	R202fs	16:75513120-75513121	frameshift	p
c.612_614delGCG insAT	P204fs	16:75513113-75513115	frameshift	p
-	R205fs	16:75513113	frameshift	p
c.740delG	A247fs	16:75512987	frameshift	p
c.786delC	L264fs	16:75512941	frameshift	p
c.891-892insC	P297fs	16:75512835-75512836	frameshift	p
c.894_895 insG	Q298fs	16:75512832-16:75512833	frameshift	p
-	H335fs	16:75512724	frameshift	vus
c.1043_1044delTG	C349fs	16:75512683-75512684	frameshift	vus
c.1044_1051dupGTGCGCTG	L353fs	16:75512676-75512683	frameshift	vus
c.1056_1078delGCTGCAGCTGCTGGGCTACCGGC	A352fs	16:75512649-75512671	frameshift	vus
c.1089_1090delTG	E364fs	16:75512637-75512638	frameshift	vus
c.6G>A	W2X	16:75513721	nonsense	P	PM2+PM4							Allele not found in Broad gnomAD exomes despite good coverage=41 (greater than 20).Allele is not covered in Broad gnomAD genomes.		Stop-gain variant in gene CHST6, and not in a repeat region (per UniProt).
c.52C>T	Q18X	16:75513675	nonsense	P	PM2+PM4							Allele not found in Broad gnomAD exomes despite good coverage=43 (greater than 20).Allele is not covered in Broad gnomAD genomes.		Stop-gain variant in protein CHST6_HUMAN, and not in a repeat region (per UniProt).
c.95C>A	S32X	16:75513632	nonsense	P	PM2+PM4							Allele is not covered in Broad gnomAD genomes.		Stop-gain variant in gene CHST6, and not in a repeat region (per UniProt).
c.143C>A	S48X	16:75513584	nonsense	P	PM2+PM4+PP3							Allele is not covered in Broad gnomAD genomes.		Stop-gain variant in gene CHST6, and not in a repeat region (per UniProt).					Pathogenic computational verdict because 4 pathogenic predictions from DANN, GERP, LRT and MutationTaster (vs no benign predictions).
C.152C>A	S51X	16:75513575	nonsense	P	PM1+PM2+PM4+PP3						Located in a mutational hot spot and/or critical and well-established functional domain (e.g., active site of an enzyme) without benign variation （sulfotransferase domain)	Allele is not covered in Broad gnomAD genomes.		Stop-gain variant in protein CHST6_HUMAN, and not in a repeat region (per UniProt).					Pathogenic computational verdict because 4 pathogenic predictions from DANN, GERP, LRT and MutationTaster (vs no benign predictions).
c.172C>T	Q58X	16:75513555	nosense	P	PM2+PM4+PP3+PP5							Allele is not covered in Broad gnomAD genomes.		Stop-gain variant in gene CHST6, and not in a repeat region (per UniProt).					Pathogenic computational verdict because 4 pathogenic predictions from DANN, GERP, LRT and MutationTaster (vs no benign predictions).		ClinVar classifies variant as Pathogenic, 1 star (above minimum of 1 star), related to Macular Corneal Dystrophy Type I, but there is insufficient support for PS3 as there are no associated publications.
c.244C>T	Q82X	16:75513483	nosense	P	PM1+PM2+PM4+PP3						Located in a mutational hot spot and/or critical and well-established functional domain (e.g., active site of an enzyme) without benign variation （sulfotransferase domain)	Allele is not covered in Broad gnomAD genomes.		Stop-gain variant in gene CHST6, and not in a repeat region (per UniProt).					Pathogenic computational verdict because 4 pathogenic predictions from DANN, GERP, LRT and MutationTaster (vs no benign predictions).
c.369G>A	W123X	16:75513358	nonsense	P	PM1+PM2+PM4+PP3						Located in a mutational hot spot and/or critical and well-established functional domain (e.g., active site of an enzyme) without benign variation （sulfotransferase domain)	Allele is not covered in Broad gnomAD genomes.		Stop-gain variant in gene CHST6, and not in a repeat region (per UniProt).					Pathogenic computational verdict because 3 pathogenic predictions from DANN, LRT and MutationTaster (vs no benign predictions).
c.418C>T	R140X	16:75513309	nonsense	P	PM1+PM2+PM4+PP3						Located in a mutational hot spot and/or critical and well-established functional domain (e.g., active site of an enzyme) without benign variation （sulfotransferase domain)	Allele is not covered in Broad gnomAD genomes.		Stop-gain variant in gene CHST6, and not in a repeat region (per UniProt).					Pathogenic computational verdict because 3 pathogenic predictions from DANN, LRT and MutationTaster (vs no benign predictions).
c.459C>A	C153X	16:75513268	nonsense	P	PM1+PM2+PM4+PP3						Located in a mutational hot spot and/or critical and well-established functional domain (e.g., active site of an enzyme) without benign variation （sulfotransferase domain)	Allele is not covered in Broad gnomAD genomes.		Stop-gain variant in gene CHST6, and not in a repeat region (per UniProt).					Pathogenic computational verdict because 3 pathogenic predictions from DANN, LRT and MutationTaster (vs no benign predictions).
c.696G>A	W232X	16:75513031	nonsense	P	PM1+PM2+PM4						Located in a mutational hot spot and/or critical and well-established functional domain (e.g., active site of an enzyme) without benign variation （sulfotransferase domain)	Allele is not covered in Broad gnomAD genomes.		Stop-gain variant in gene CHST6, and not in a repeat region (per UniProt).
c.730G>T	E244X	16:75512997	nonsense	P	PM1+PM2+PM4+PP3						Located in a mutational hot spot and/or critical and well-established functional domain (e.g., active site of an enzyme) without benign variation （sulfotransferase domain)	Allele is not covered in Broad gnomAD genomes.		Stop-gain variant in gene CHST6, and not in a repeat region (per UniProt).					Pathogenic computational verdict because 4 pathogenic predictions from DANN, GERP, LRT and MutationTaster (vs no benign predictions).
c.760G>T	E254X	16:75512967	nonsense	P	PM1+PM2+PM4+PP3						Located in a mutational hot spot and/or critical and well-established functional domain (e.g., active site of an enzyme) without benign variation （sulfotransferase domain)	Allele is not covered in Broad gnomAD genomes.		Stop-gain variant in gene CHST6, and not in a repeat region (per UniProt).					Pathogenic computational verdict because 4 pathogenic predictions from DANN, GERP, LRT and MutationTaster (vs no benign predictions).
c.892C>T	Q298X	16:75512835	nonsense	p	PS3+PM1+PM2+PM4				ClinVar classifies variant as Pathogenic, 1 star (above minimum of 1 star), related to Macular Corneal Dystrophy Type I, as evidenced using clinical testing by Illumina Clinical Services Laboratory,Illumina, and 2 publications: PMID: 19365571 and PMID: 20539220.		Located in a mutational hot spot and/or critical and well-established functional domain (e.g., active site of an enzyme) without benign variation （sulfotransferase domain)	Allele is not covered in Broad gnomAD genomes.		Stop-gain variant in gene CHST6, and not in a repeat region (per UniProt).
c.925G>T	G309X	16:75512802	nonsense	LP	PM1+PM2+PM4+PP3						Located in a mutational hot spot and/or critical and well-established functional domain (e.g., active site of an enzyme) without benign variation （sulfotransferase domain)	Allele is not covered in Broad gnomAD genomes.		Stop-gain variant in gene CHST6, and not in a repeat region (per UniProt).					Pathogenic computational verdict because 4 pathogenic predictions from DANN, GERP, LRT and MutationTaster (vs no benign predictions).
c.991C>T	Q331X	16:75512736	nonsense	LP	PM1+PM2+PM4+PP3						Located in a mutational hot spot and/or critical and well-established functional domain (e.g., active site of an enzyme) without benign variation （sulfotransferase domain)	Allele is not covered in Broad gnomAD genomes.		Stop-gain variant in gene CHST6, and not in a repeat region (per UniProt).					Pathogenic computational verdict because 4 pathogenic predictions from DANN, GERP, LRT and MutationTaster (vs no benign predictions).
c.1039G>T	E347X	16:75512688	nonsense	LP	PM1+PM2+PP2+PP3						Located in a mutational hot spot and/or critical and well-established functional domain (e.g., active site of an enzyme) without benign variation （sulfotransferase domain)	Allele is not covered in Broad gnomAD genomes.						Missense variant in gene CHST6 which has 65 pathogenic missense variants vs 2 benign missense variants (ratio=32.5 is greater than 3 threshold), associated with the following conditions: Macular dystrophy, corneal, 1 and Macular dystrophy, corneal, 2.	Pathogenic computational verdict because 8 pathogenic predictions from DANN, GERP, dbNSFP.FATHMM, LRT, MetaLR, MetaSVM, MutationAssessor and MutationTaster (vs 1 benign prediction from PROVEAN).
Deletion Including ORF			entire	P
Replacement of 5'region			entire	P
Deletion of 5'region			entire	P
c.601_621delGTGCGCGACCCGCGGGCCGTG	deletion from aa201-207	16:75513106-75513126	deletion	vus
c.587insACG	R195-196ins	16:75513140	Insertation	vus
c.656insCTG	W219-220ins	16:75513071	Insertation	vus
c.581ACCTAC>GGT	194 Asn Leu Arg 196; 194 Arg Cys 195	16:75513146	replacement mutation	vus
